1 **eEF1A2 controls local translation and actin dynamics in structural synaptic plasticity**

2

3 Mònica B. Mendoza<sup>1,5</sup>, Sara Gutierrez<sup>1,5</sup>, Raúl Ortiz<sup>1</sup>, David F. Moreno<sup>1</sup>, Maria Dermit<sup>2</sup>, Martin Dodel<sup>2</sup>,  
4 Elena Rebollo<sup>1</sup>, Miquel Bosch<sup>3,4</sup>, Faraz K. Mardakheh<sup>2</sup>, Carme Gallego<sup>1\*</sup>

5 <sup>1</sup>Molecular Biology Institute of Barcelona (IBMB), CSIC, Catalonia, 08028, Spain

6 <sup>2</sup>Centre for Cancer Cell & Molecular Biology, Barts Cancer Institute, Queen Mary University of  
7 London, Charterhouse square, London EC1M 6BQ, UK.

8 <sup>3</sup>Department of Basic Sciences, Universitat Internacional de Catalunya (UIC-Barcelona), 08195 Sant  
9 Cugat del Vallès, Spain

10 <sup>4</sup>Institute for Bioengineering of Catalonia (IBEC), The Barcelona Institute of Science and Technology  
11 (BIST), Barcelona 08028 Spain

12 <sup>5</sup>Co-first author

13 \*Correspondence: [cggbmc@ibmb.csic.es](mailto:cggbmc@ibmb.csic.es)

14

15

16 **Abstract**

17 Synaptic plasticity involves structural modifications in dendritic spines. Increasing evidence suggests  
18 that structural plasticity is modulated by local protein synthesis and actin remodeling in a synapsis-  
19 specific manner. However, the precise molecular mechanisms connecting synaptic stimulation to  
20 these processes in dendritic spines are still unclear. In the present study, we demonstrate that the  
21 configuration of phosphorylation sites in eEF1A2, an essential translation elongation factor in  
22 neurons, is a key modulator of structural plasticity in dendritic spines. A mutant that cannot be  
23 phosphorylated stimulates translation but reduces actin dynamics and spine density. By contrast, the  
24 phosphomimetic variant loosens its association with F-actin and becomes inactive as a translation  
25 elongation factor. Metabotropic glutamate receptor signaling triggers a transient dissociation of  
26 eEF1A2 from its GEF protein in dendritic spines, in a phospho-dependent manner. We propose that  
27 eEF1A2 establishes a crosstalk mechanism that coordinates local translation and actin dynamics  
28 during spine remodeling.

29

30

## 1 **Introduction**

2 Dendritic spines mediate the vast majority of excitatory synaptic transmission events in the  
3 mammalian brain. Structural changes in dendritic spines are essential for synaptic plasticity and brain  
4 development (Holtmaat and Svoboda, 2009). The total excitatory input that a neuron can receive is  
5 dependent on the complexity of the dendritic network and the density and morphology of spines.  
6 Small alterations in average spine density and size may reveal a profound dysfunction at the cellular  
7 or circuit level (Forrest et al., 2018). Inside dendritic spines, biochemical states and protein-protein  
8 interactions are dynamically modulated by synaptic activity, leading to the regulation of protein  
9 synthesis and reorganization of the actin cytoskeleton (Nakahata and Yasuda, 2018). An increasing  
10 number of studies support the idea that the actin cytoskeleton and the translation machinery are  
11 intrinsically connected and may show reciprocal regulation (DeRubeis et al., 2013; Huang et al., 2013;  
12 Santini et al., 2017). Perturbation of the actin cytoskeleton is associated with a dramatic reduction in  
13 the rate of global protein synthesis in yeast and mammalian cells (Kim and Coulombe, 2010; Piper et  
14 al., 2015).

15 Regulation of mRNA translation initiation and elongation is essential for synaptic plasticity and  
16 memory formation (Gal-Ben-Ari et al., 2012; Kapur et al., 2017; Sossin and Costa-Mattioli, 2019).  
17 Studies on the regulation of translation have traditionally focused on the initiation step. There is,  
18 however, growing evidence that the elongation step is also regulated to achieve a more robust  
19 transient control of the translational machinery in response to synaptic activity (Kenney et al., 2014;  
20 Wang et al., 2010). The eukaryotic elongation factor 1 alpha (eEF1A) is a classic G-protein that  
21 delivers aminoacylated tRNAs to the A site of the ribosome during translation elongation in a GTP-  
22 dependent manner. Recycling of the inactive eEF1A-GDP complex back to the active GTP-bound state  
23 is mediated by the eEF1B complex, which acts as a guanine nucleotide exchange factor (GEF)  
24 (Negrutskii and El'skaya, 1998). In addition to its well established function in protein synthesis, a  
25 number of non-canonical functions have been reported for eEF1A (Sasikumar et al., 2012). The most  
26 studied of these is the ability of eEF1A to interact with and modulate the actin cytoskeleton (Bunai et  
27 al., 2006; Gross and Kinzy, 2005; Liu et al., 1996).

28 Vertebrates have two *eEF1A* genes that encode different isoforms, eEF1A1 and eEF1A2.  
29 Intriguingly, these isoforms are 92% identical at the amino acid level (Soares et al., 2009) and yet  
30 they display very different expression patterns. Isoform eEF1A1 is expressed ubiquitously during  
31 development but is replaced by isoform eEF1A2 in neurons and muscle cells over the course of  
32 postnatal development (Khalyfa et al., 2001). This expression switch is a vital process, and the  
33 complete loss of function of the isoform eEF1A2 in the mouse causes severe neurodegeneration, loss  
34 of muscle bulk and death by 4 weeks (Chambers et al., 1998). Despite the fact that numerous studies

1 have been published on the two eEF1A variants, the reasons underlying the developmental switch  
2 between the two eEF1A isoforms in neurons and muscle cells remain poorly understood.

3 eEF1A displays a large repertoire of post-translational modifications brought about by  
4 phosphorylation, most of them occurring within conserved regions of both isoforms (Negrutskii et al.,  
5 2012; Soares et al., 2009; Soares and Abbott, 2013). As an interesting exception, it has been reported  
6 that the kinase receptor for activated protein C kinase 1 (RACK1) recruits stress-activated c-Jun N-  
7 terminal kinase (JNK) to polysomes, where it phosphorylates eEF1A2 at Ser205 and Ser358 and  
8 promotes degradation of newly synthesized polypeptides by the proteasome. Since Ser358 is  
9 evolutionary conserved but not present in isoform eEF1A1, this post-transcriptional regulatory  
10 mechanism could constitute a relevant difference in the physiological roles of the two isoforms  
11 (Gandin et al., 2013).

12 So far, although eEF1A2 is the most abundant isoform in mature neurons, most published work  
13 has been carried out in a non-neuronal context. It is worth noting that the developmental timeline of  
14 synaptic spines and neuronal circuit formation occurs when isoform eEF1A1 is totally replaced by  
15 isoform eEF1A2 in neurons. Another concern is that numerous data from experiments in mammalian  
16 cells have been analyzed with antibodies that do not distinguish between the two isoforms. Here, we  
17 demonstrate that the configuration of phosphorylation sites unique to the eEF1A2 isoform plays a  
18 role in dendritic structural plasticity. We show that expression of a phosphoablated mutant in  
19 hippocampal neurons results in a significant reduction in dendritic spine density. By contrast,  
20 expression of a phosphomimetic mutant impairs its association with F-actin increasing its mobility  
21 and F-actin dynamics both in dendrites and synaptic spines. Regarding the canonical function of  
22 eEF1A2, we found that the phosphomimetic variant is unable to sustain translation in yeast cells.  
23 Moreover, our study reveals that the stimulation of metabotropic glutamate receptor signaling  
24 triggers a transient dissociation of eEF1A2 from its GEF protein in a phosphosite-dependent manner.  
25 Our findings demonstrate important mechanistic differences between the two eEF1A isoforms and  
26 point to the notion that eEF1A2 locally links synaptic inputs to translation and actin remodeling for  
27 structural plasticity in neurons via a phospho-dependent regulation.

28

## 29 **Results**

### 30 **eEF1A2 phosphosite configuration modulates spine growth**

31 First, we wanted to test whether the eEF1A isoform switch can be reproduced *in vitro*. Consistent  
32 with previous studies in mouse brain (Khalyfa et al., 2001), we observed that isoform eEF1A2  
33 expression progressively increased in cultures of hippocampal neurons, becoming the main isoform  
34 two weeks after cell plating. The progressive increase was observed at both protein and mRNA levels  
35 (Figure 1A-C). Although eEF1A1 and eEF1A2 contain 462 and 463 amino acid residues respectively,

1 isoform eEF1A1 migrated slightly faster as deduced by immunoblot analysis with a specific antibody  
2 against isoform eEF1A2 (Figure 1A). Whereas eEF1A2 is exclusively expressed in neurons, eEF1A1 is  
3 the main isoform in glial cells (Pan et al., 2004), which explains why we observed low levels of  
4 eEF1A1 in long-term hippocampal cultures.

5 The high resolution structure of the yeast eEF1A factor reveals a compact conformation with  
6 three domains displaying multiple mutual interactions (Andersen et al., 2001, 2000). While domain I  
7 contains the GTP-binding site, domain II is implicated in the interaction with aminoacyl-tRNA. Both  
8 domains interact with eEF1B $\alpha$  during the exchange of GDP for GTP. Finally, domain II and domain III  
9 carry residues important for the interaction of eEF1A with the actin cytoskeleton (Liu et al., 2002;  
10 Mateyak and Kinzy, 2010; Soares et al., 2009). In domain III, isoform eEF1A2 presents four putative  
11 phosphorylation residues, Ser342, Ser358, Ser393 and Ser445, that are not present in isoform  
12 eEF1A1 (Figure 1D and Figure 1—figure supplement 1A). Ser358 is conserved in organisms that only  
13 have one eEF1A isoform but is restricted to eEF1A2 once this isoform appears in evolution (Figure 1—  
14 supplement 1A). This residue is known to be phosphorylated by polysome-associated JNK in response  
15 to DHPG (Gandin et al., 2013).

16 To test whether phosphorylation in domain III is relevant to eEF1A2 function in synaptic plasticity,  
17 we replaced the four eEF1A2-specific serines with alanine or glutamic acid to obtain phosphoablated  
18 (SA) and phosphomimetic (SE) mutants, respectively. CA1 pyramidal cells of rat hippocampal slice  
19 cultures were co-transfected with GFP or GFP-eEF1A2 proteins (wt, SA and SE) and DsRed2 to analyze  
20 spine density. The phosphoablated mutant showed a significant reduction in the number of dendritic  
21 spines compared to wt and mutant SE (Figure 1E). These results were also confirmed using  
22 dissociated hippocampal neurons (Figure 1—figure supplement 1B). We then estimated eEF1A2  
23 distribution by comparing the GFP signal in spines versus the adjacent dendritic shafts. The SE  
24 mutant showed a reduced accumulation in spines compared to the GFP-eEF1A2 wt and SA mutant  
25 and similar to the levels of GFP (Figure 1F), suggesting that phosphorylation in domain III modulates  
26 eEF1A2 targeting to spines. In all, our data point to the notion that eEF1A2 phosphorylation is  
27 important for regulation of structural synaptic plasticity.

28

### 29 **Interactome analysis of eEF1A2 phosphomutants dissects translational and non-canonical** 30 **functions**

31 To elucidate the role of eEF1A2 phosphorylation we decided to examine the interactomes of both  
32 the SA and SE mutants.  $\alpha$ FLAG immunoprecipitates from HEK293T cells transfected with *FLAG-*  
33 *eEF1A2<sup>SA</sup>* or *FLAG-eEF1A2<sup>SE</sup>* cDNAs were analyzed by LC-MS/MS. Out of a total of 3026 proteins  
34 identified, 37 proteins were differentially enriched in SA immunoprecipitates (SA-IP) and 88 proteins  
35 in SE immunoprecipitates (SE-IP) (Appendix 1—table 1). Gene ontology (GO) enrichment analysis

1 showed that proteins associated with ribosome biogenesis and translational elongation were  
2 significantly ( $p < 0.001$ ) overrepresented in SA-IP compared to SE-IP (Figures 2A and Figure 2–figure  
3 supplement 1). Among translation-associated proteins we found Valyl-tRNA synthetase 1, eEF1D,  
4 eEF1B2, Cysteinyl-tRNA synthetase, eEF1G and eEF1A1 (Figure 2B). The more efficient interaction of  
5 the SA mutant with eEF1A1 suggests that eEF1A2 phosphorylation modulates its ability to dimerize.  
6 By contrast, the SE-IP showed a significant enrichment of interactors involved in vesicle transport  
7 ( $p < 0.001$ ), protein modification ( $p = 0.006$ , mostly protein ubiquitination), stress response ( $p = 0.024$ )  
8 and nuclear functions such as DNA replication ( $p = 0.030$ ) or nuclear import ( $p = 0.026$ ). In addition to  
9 these categories SE-IP showed enrichment in a set of proteins other than actin itself, which are  
10 involved in actin cytoskeleton dynamics: Shroom3 ( $p < 0.001$ ), Filamin-B ( $p < 0.001$ ),  $\alpha$ -actinin-4  
11 ( $p = 0.008$ ), RhoA ( $p = 0.014$ ) and F-actin-capping  $\beta$  ( $p = 0.010$ ), suggesting that eEF1A2 phosphorylation  
12 could be involved in modulating actin dynamics (Gross, 2013; Truebestein et al., 2015) (Figure 2B).

13 As a complement to the GO enrichment analysis, we examined how the yeast orthologues of  
14 human eEF1A2-phosphomutant interactors are grouped in the global yeast genetic interaction  
15 network (Usaj et al., 2017). As shown in Figure 2C, whereas phosphoablated eEF1A2 interactors were  
16 found in clusters related to ribosome biogenesis and mRNA processing, phosphomimetic eEF1A2  
17 binding proteins displayed strong genetic interactions in smaller clusters, many of them related to  
18 non-canonical functions such as endocytosis, nuclear processes or actin cytoskeleton dynamics.

19

### 20 **Phosphomimetic residues in eEF1A2 hinder its association with F-actin and increase actin dynamics**

21 The first step in remodeling the spine actin network is the unbundling of actin filaments (F-actin),  
22 which are normally crosslinked by different types of actin-binding proteins. Dissociation of these  
23 actin-crosslinking proteins would allow access to other actin-binding proteins to stimulate spatial-  
24 temporal flexibility of the actin filament network (Cingolani and Goda, 2008). To determine whether  
25 eEF1A2 phosphorylation could have an effect on its association with F-actin, we used pulldowns (PD)  
26 of biotinylated actin to measure the actin-binding properties of phosphomutant-eEF1A2 proteins.  
27 The immunoblotting analysis showed that protein levels of the SE mutant bound to actin were  
28 remarkably lower compared to wt and SA proteins (Figure 3A and B). In order to further test whether  
29 phosphorylation is sufficient to detach eEF1A2 from F-actin, we performed F-actin bundling assays at  
30 low speed in which we observed that purified SE mutant completely loses F-actin binding activity  
31 (Figure 3C and D).

32 As F-actin is the major cytoskeletal protein in dendritic spines, we next tested whether  
33 phosphorylation of eEF1A2 in domain III regulates eEF1A2 dynamics at the synapse. Hippocampal  
34 neurons at 14 DIV were co-transfected with GFP-eEF1A2 proteins and LifeAct-mCherry as a marker  
35 for F-actin and, one day after transfection, we obtained time-series images to be analyzed by

1 fluctuation analysis methods (Digman and Gratton, 2012). Notably, the phosphomimetic SE mutant  
2 showed a clear increase in the coefficient of variation (CV) of the fluorescence intensity over time in  
3 single pixels of spines when compared to the SA mutant (Figure 3E and F). These results could be  
4 explained by a higher propensity to dimerize, which would decrease the number of mobile  
5 fluorescent particles and, hence, increase the amplitude of fluctuations in the focal volume.  
6 However, ruling out this possibility, the SE mutant showed a lower dimerization efficiency than the  
7 SA mutant (Figure 3–figure supplement 1A). As an alternative, the lower fluctuation dynamics shown  
8 by the SA mutant in dendritic spines could be due to its association with relatively immobile  
9 structures such as the actin cytoskeleton. If this assumption were true, we would expect the local  
10 concentration of F-actin negatively correlate with the level of fluctuations. Results from single pixel  
11 analysis showed a clear negative correlation between LifeAct-mCherry levels and the fluorescence CV  
12 of the GFP-eEF1A2 SA mutant (Figure 3G). Furthermore, the accumulation of F-actin also produced  
13 the accumulation of the SA mutant protein at a single-pixel level in spines (Figure 3–figure  
14 supplement 1B). These results were also observed in dendritic axes (Figure 3–figure supplement 1C-  
15 E), supporting the idea that eEF1A2 phosphorylation prevents its interaction with F-actin and  
16 increases its mobility in spines and dendrites. Fluorescence fluctuations analysis at a single pixel level  
17 showed an increase in the coefficient of variation of LifeAct-mCherry in SE mutant compared to SA  
18 mutant (Figure 3H), indicating that the phosphomimetic form of eEF1A2 intensifies actin dynamics.  
19 To further explore this possibility, we measured mScarlet-actin mobility by fluorescence recovery  
20 after photobleaching (FRAP) in dendritic spines of neurons cotransfected with GFP-eEF1A2 proteins.  
21 Neurons expressing the phosphomimetic mutant showed faster recovery of mScarlet-actin  
22 fluorescence after photobleaching (Figure 3I-J). Furthermore, we detected a reduction in the mobile  
23 fraction of mScarlet-actin with the SA mutant (Figure 3K). In all, these results support the idea that  
24 the phosphorylation state of eEF1A2 regulates its interaction with actin and modulates actin  
25 dynamics.

26

### 27 **The phosphomimetic eEF1A2 mutant cannot sustain protein synthesis in yeast cells**

28 In order to investigate the role of phosphorylation in translation, we decided to use budding yeast  
29 cells as an amenable model for precise genetic intervention. Since budding yeast cells possess two  
30 identical eEF1A-encoding genes (*TEF1* and *TEF2*), we used a strain in which the chromosomal copy of  
31 *TEF1* was disrupted and *TEF2* expression was under the control of a regulatable promoter. However,  
32 only mammalian Ser358 is conserved as Ser356 in yeast. We therefore expressed wt, SA or SE  
33 versions of *TEF1* under endogenous promoter *in trans* using a centromeric vector. Cells with empty  
34 vector grew slowly under *TEF2*-inducing conditions, but did not grow under repression conditions  
35 (Figure 4A). As expected, the presence of a full wt *TEF1* copy *in trans* fully rescued these phenotypes.

1 However, while the SA mutant was indistinguishable from wt, cells expressing the SE mutant were  
2 completely unable to grow under repression conditions. To ascertain defects in growth, we directly  
3 measured volume increase rates in G1 cells and observed the same results (Figure 4B). Finally, we  
4 performed pulse-labeling experiments 0, 3 or 6 h after promoter shut off (Figure 4C and D) and found  
5 that the phosphomimetic SE mutant caused a strong reduction in the overall protein synthesis rate.  
6 Therefore, these experiments support the notion that eEF1A2 phosphorylation at Ser358 inhibits  
7 protein synthesis in dendritic spines.

8 Considering the results related to the eEF1A2-actin interaction in neurons, we set out to  
9 investigate whether eEF1A2 phosphomutants would affect actin dynamics in yeast cells. Due to the  
10 lethal phenotype of SE mutant we were only able to analyze the SA mutant. Yeast actin cables  
11 assemble in the bud and bud neck and elongate into the mother cell during polarized growth from  
12 late G1 to the G2/M transition. To estimate actin cable growth, we photobleached Abp140p-GFP, an  
13 actin-binding protein, either at the bud neck (proximal bleaching) or at the opposite pole (distal  
14 bleaching, as control) and monitored loss of fluorescence in the middle third of the mother cell  
15 (Figure 4–figure supplement 1A). Since new actin monomers are added close to the bud neck, an  
16 increase in actin cable stability would favor Abp140p-GFP displacement and, hence, accelerate loss of  
17 fluorescence along the cable (Yang and Pon, 2002). We found that the SA mutant caused a significant  
18 increase in loss of fluorescence only if Abp140p-GFP was photobleached at a proximal position  
19 (Figure 4–figure supplement 1B), suggesting that the phosphoablated SA protein stabilizes actin  
20 cables in yeast cells.

21

## 22 **eEF1A2 stimulates translation in neuronal cells and interacts with its GEF in dendritic spines in a** 23 **phosphosite-dependent manner**

24 Given the severe translation defects caused by the phosphomimetic mutant in yeast cells, we  
25 decided to address this question in a neuronal cell line. To maximize the effect of transfected eEF1A2  
26 proteins we created a stable Neuro-2a cell line expressing a shRNA against the 3'UTR of endogenous  
27 eEF1A2 and, after cotransfection of plasmids expressing GFP and eEF1A2 proteins, we carried out a  
28 puromycylation assay to visualize newly synthesized proteins (Figure 5A). We found that the SA  
29 mutant was able to stimulate translation (Figure 5B). In contrast, puromycin incorporation by the SE  
30 mutant was not significantly different from non-transfected cells. These results fully agree with the  
31 results obtained in yeast and confirm the relevance of eEF1A2 phosphosites in translation. Then, we  
32 decided to study the possible causes of this important functional output. Exchange of GDP for GTP is  
33 the first step in eEF1A2 recycling during translation, which is driven by eEF1B2 as catalytic  
34 component of the guanine nucleotide exchange (GEF) complex. To confirm the interactome analysis  
35 we decided to study the effects of phosphosites in the interaction between these two factors and

1 performed immunoprecipitation analysis in HEK293T cells that had been co-transfected with HA-  
2 eEF1B2 and FLAG-eEF1A2 fusion proteins. We observed that the SE mutant was specifically affected,  
3 showing a 5-fold decrease in levels of co-immunoprecipitated eEF1B2 protein compared to wt (Figure  
4 5C and D). By contrast, the phosphoablated SA mutant was as efficient as the wt eEF1A2 protein.

5 Next we wanted to visualize this interaction in dendritic spines where local translation plays an  
6 important role in synaptic plasticity. To this end, we measured Förster-resonance energy transfer  
7 (FRET) between mGFP-eEF1A2 and mScarlet-eEF1B2 (Figure 5E) and obtained interaction maps on  
8 spines from hippocampal neurons transfected at 13 DIV and imaged after 24 h. Notably, the SE  
9 mutant showed a significant reduction in FRET levels compared to the SA mutant and wt in spines  
10 (Figure 5F and G). Accordingly, the phosphoablated SA mutant showed the highest FRET levels,  
11 significantly higher than wt. Similar relative differences were obtained when FRET was analyzed in  
12 the soma of transfected Neuro-2a cells (Figure 5—figure supplement 1). In all, these results strongly  
13 support the idea that phosphorylation of the eEF1A2 factor could regulate its association with the  
14 eEF1B2 GEF and consequently modulate protein synthesis.

15

### 16 **DHPG induces transient phosphosite-mediated dissociation of eEF1A2 from its GEF in dendritic** 17 **spines**

18 Group 1 metabotropic glutamate receptors (mGluR1 and mGluR5) are implicated in different forms  
19 of mGluR-mediated synaptic plasticity that depend in part on regulation of local protein synthesis  
20 (Bear et al., 2004; Di Prisco et al., 2014; Muddashetty et al., 2007; Waung and Huber, 2009).

21 Activation of mGluRs by DHPG stimulates the JNK pathway in cultured neurons (Yang et al., 2006)  
22 and has been linked to phosphorylation of key synaptic proteins such as PSD95 or elongation factor  
23 eEF2 (Nelson et al., 2013; Park et al., 2008). Moreover, polysome-associated JNK phosphorylates  
24 eEF1A2 at residues Ser205 and Ser358 as a response to DHPG in primary striatal neurons (Gandin et  
25 al., 2013). Taking all this data into consideration, we decided to analyze whether the activation of  
26 mGluRs with DHPG regulates the activity of eEF1A2 as an elongation factor. As expected, DHPG  
27 provoked a transient phosphorylation of eEF1A2 that reached its peak 4 min after treatment (Figure  
28 6—figure supplement 1A and B). We then used the abovementioned FRET-based approach to analyze  
29 *in vivo* the association between eEF1A2 and its GEF eEF1B2. Remarkably, FRET levels in spines of  
30 neurons expressing wild-type eEF1A2 temporarily dropped during the first 4 min after DHPG addition,  
31 indicating that DHPG causes a reversible reduction in eEF1A2-eEF1B2 interaction within a narrow  
32 time window after stimulation (Figure 6A and B). We noted that the fold-change reduction was  
33 stronger in spines with higher initial FRET values (Figure 6B and C). In sharp contrast, FRET levels  
34 produced by the phosphoablated SA mutant were maintained during DHPG treatment and did not  
35 correlate with the initial status of the spine. Thus, our results indicate that DHPG transiently



1 downregulates the interaction between eEF1A2 and eEF1B2, thereby affecting the first step in the  
2 eEF1A activation cycle for translation elongation. Since the phosphoablated mutant was totally  
3 unaffected, the observed modulation would link activation of mGluRs, eEF1A2 phosphorylation and  
4 local modulation of translation in spines.

5

## 6 **Discussion**

7 In this study we aimed to understand the physiological relevance of the eEF1A2 isoform in the  
8 context of synaptic plasticity. To this end, we focused our attention on Ser358 and three additional  
9 potential phosphorylation sites only present in isoform eEF1A2. Briefly, a phosphomimetic eEF1A2 SE  
10 mutant was seriously compromised in its ability to bind actin and produce actin bundles. Similar to  
11 the proposed role of CaMKII $\beta$  in actin dynamics during LTP (Kim et al., 2015), dissociation of eEF1A2  
12 would allow actin reorganization and activation of regulatory proteins related with actin cytoskeleton  
13 remodeling. Supporting this notion, our proteomic analysis showed a clear enrichment of actin  
14 binding proteins in SE immunoprecipitates. Actin binding proteins play roles in many different  
15 aspects of actin dynamics: polymerization, depolymerization, nucleation, branching, capping, cross-  
16 linking and trafficking (Pollard, 2016). Thus, according to previous studies in yeast (Perez and Kinzy,  
17 2014; Umikawa et al., 1998), it is possible that eEF1A acts as a bridge between the cytoskeleton and  
18 actin modulators. Notably, as one of the proteins enriched in SE immunoprecipitates we found  $\alpha$ -  
19 actinin-4, a Ca<sup>2+</sup>-sensitive actin-binding protein that interacts with group 1 mGluRs and orchestrates  
20 spine morphogenesis in primary neurons (Kalinowska et al., 2015). These data, along with the fact  
21 that the phosphoablated SA mutant causes a strong reduction in spine density in hippocampal  
22 neurons, point to the notion that phosphorylation of eEF1A is important for long-term structural  
23 plasticity.

24 In agreement with a role in structural plasticity, the eEF1A2 isoform has been implicated in  
25 metastasis (Abbas et al., 2015; Scaggiante et al., 2012; Tomlinson et al., 2005). It has been shown  
26 that eEF1A2 overexpression stimulates actin remodeling, cell invasion and migration (Amiri et al.,  
27 2007). A previous study in adenocarcinoma cell lines showed that eEF1A from metastatic cells has  
28 reduced F-actin affinity (Edmonds et al., 1996). Notably, eEF1A2 was found to be more enriched than  
29 eEF1A1 in cell protrusions of breast cancer cells (Mardakheh et al., 2015). These findings allow us to  
30 propose that localized eEF1A2 phosphorylation weakens its association with actin, increasing  
31 cytoskeleton reorganization, cell motility and finally, metastatic growth.

32 Synaptic activity has been reported to regulate the local translational machinery through changes  
33 in the phosphorylation status of initiation and elongation factors (Sossin and Costa-Mattioli, 2019).  
34 However, *in vivo* evidence for mechanisms regulating translation at a local level are still missing. Our  
35 FRET analysis to visualize the interaction between eEF1A2 and its GEF, the most upstream step in the

1 translation elongation cycle, is the first direct evidence of a locally-modulated translation event in  
2 synaptic spines. Activation of mGluRs by DHPG stimulates the JNK pathway (Yang et al., 2006), and  
3 polysome-associated JNK phosphorylates eEF1A2 at Ser358 as a response to DHPG in primary striatal  
4 neurons (Gandin et al., 2013). Thus, our data on the behavior of phosphoablated and  
5 phosphomimetic mutants point to the notion that phosphorylation of eEF1A2 by JNK and/or other  
6 protein kinases mediating synaptic signals plays a key role in regulating local translation in dendritic  
7 spines.

8 Although local effects have not been demonstrated yet *in vivo*, a similar scenario has been  
9 described for eEF2 and translational suppression in cultured neurons (Marin et al., 1997; Park et al.,  
10 2008; Sutton et al., 2007), synaptic biochemical fractions (Scheetz et al., 2000) and hippocampal  
11 slices (Chotiner et al., 2003) after synaptic stimulation. This raises the question of whether inhibition  
12 of protein synthesis by the two elongation factors eEF1A2 and eEF2 are redundant mechanisms.  
13 Since both have been observed under similar mGluR stimulation conditions, phosphorylation of  
14 these two factors could be modulated by specific secondary signals. However, there is growing  
15 evidence that eEF1A also has a profound impact at the initiation step of protein synthesis. In yeast,  
16 mutations in eEF1A that affect aminoacyl-tRNA binding simultaneously cause actin binding and/or  
17 bundling defects but, intriguingly, increase phosphorylation of eIF2A by GCN2, the eIF2A kinase  
18 (Gross and Kinzy, 2007; Perez and Kinzy, 2014). Phosphorylation at Ser51 (conserved from yeast to  
19 mammals) by GCN2 converts eIF2A into an inhibitor of its own GEF eIF2B, leading to attenuation of  
20 general protein synthesis (Sonenberg and Hinnebusch, 2009). Therefore, regulation of eEF1A2 would  
21 offer at least two significant advantages compared to the eEF2 factor. First, modulation of GTP  
22 loading by eEF1A2 phosphorylation provides a mechanism to regulate the most upstream step in  
23 translation elongation. Second, phosphorylation of eEF1A2 could provide feedback on translation  
24 initiation and downregulate protein synthesis in a more efficient manner. Moreover, silent mRNAs  
25 would prevent subsequent initiation rounds and remain as monosomes as recently shown (Biever et  
26 al., 2020; Heyer and Moore, 2016).

27 The functional relevance of conserved Ser358 in protein synthesis is supported by our yeast  
28 experiments in which the phosphomimetic mutant showed a strong reduction in translation rates.  
29 We speculate that this phosphorylation event could be a mechanism for adapting yeast cells to  
30 specific situations. In this regard, it has been reported that glucose starvation causes rapid actin  
31 depolarization and inhibition of translation (Uesono et al., 2004). It remains to be determined  
32 whether phosphorylation of eEF1A2 plays any roles in this concurrent regulation of translation and  
33 actin cytoskeleton.

34 Our results shed some light on the purpose of the developmental switch between the two eEF1A  
35 isoforms. The transition of eEF1A1 to eEF1A2 is associated with development of the nervous and

1 muscular systems (Lee et al., 1995). Downregulation of eEF1A1 during differentiation of these tissues  
2 is a general characteristic in vertebrates and yet is controlled through completely different species-  
3 dependent mechanisms, perhaps to establish specific mechanisms coordinating protein synthesis  
4 and cytoskeletal remodeling in terminally differentiated neurons, myocytes and cardiomyocytes  
5 (Newbery et al., 2007). According to these ideas, one of the aspects shared by these cells is a  
6 requirement for local structural plasticity. It has been shown that actin filaments have a role in  
7 maintenance of t-tubules in membranes of cardiomyocytes and myocytes (Vlahovich et al., 2009).  
8 The t-tubular membrane microfolds facilitate ion channel trafficking and modulate local ionic  
9 concentrations. Emerging evidence indicates that these microfolds generate very dynamic  
10 microdomains to modulate calcium-signaling processes (Hong et al., 2014). Furthermore, t-tubules  
11 are anchored to sarcomeric complexes whose maintenance depends on localized protein translation  
12 (Lewis et al., 2018). Thus, as we have found for dendritic spines, regulation of isoform eEF1A2 by  
13 phosphorylation could play a major role in microfold plasticity by regulating local translation and  
14 actin dynamics in sarcomeric Z discs, the t-tubule membrane-binding structure.

15 Our findings identify a novel mechanism by which metabotropic signaling regulates structural  
16 plasticity. The stimulation of mGluR increases  $Ca^{2+}$  levels, thus triggering activation of JNK and other  
17  $Ca^{2+}$  signaling kinases (Giese and Mizuno, 2013). Here we show that receptor stimulation opens a  
18 time window in which elongation factor eEF1A2 dissociates from both its GEF protein and F-actin,  
19 thus decreasing protein synthesis and increasing actin cytoskeleton remodeling. This transitional  
20 state could be common to the different forms of synaptic plasticity including LTP, LTD and  
21 homeostatic plasticity, in which activity-dependent spine remodeling is an essential initial event  
22 (Figure 6D).

23 In summary, our work uncovers a crosstalk mechanism between local translation and actin  
24 dynamics in fast response to synaptic stimulation in neurons. As muscle cells also display a  
25 developmental eEF1A switch, we propose that eEF1A2 is a general effector of structural plasticity to  
26 attain long-term physical and physiological changes at the subcellular level.

27

1 **Materials and Methods**

2 **KEY RESOURCES TABLE**

| REAGENT or RESOURCE                                                                           | SOURCE               | IDENTIFIER        |
|-----------------------------------------------------------------------------------------------|----------------------|-------------------|
| <b>Antibodies</b>                                                                             |                      |                   |
| Mouse monoclonal $\alpha$ EF1A                                                                | Millipore            | Cat#. 05-235      |
| Rabbit polyclonal $\alpha$ EF1A2                                                              | Abyntek              | Cat#. LS-C102299  |
| Rabbit polyclonal $\alpha$ EF1A2 (Ser358)                                                     | Phosphosolutions     | Cat#. P153-358-25 |
| Mouse monoclonal $\alpha$ FLAG                                                                | Sigma                | Cat#. F3165       |
| Mouse monoclonal $\alpha$ HA (12CA5)                                                          | Roche                | Cat#. 11583816001 |
| Rabbit polyclonal $\alpha$ $\beta$ -actin                                                     | Sigma                | Cat#. A2066       |
| Streptavidin IRDye 800 CW                                                                     | LI-COR Bioscience    | Cat#. 926-32230   |
| Goat polyclonal $\alpha$ mouse IRDye 800 CW                                                   | LI-COR Bioscience    | Cat#. 926-32211   |
| Goat polyclonal $\alpha$ rabbit IRDye 680 LT                                                  | LI-COR Bioscience    | Cat#. 926-68021   |
| Donkey monoclonal $\alpha$ rabbit-peroxidase                                                  | Thermo Scientific    | Cat#. 10379664    |
| Mouse monoclonal $\alpha$ Puromycin (12D10)                                                   | Millipore            | Cat#. MABE343     |
| <b>Chemicals, Peptides, and Recombinant Proteins</b>                                          |                      |                   |
| $\alpha$ FLAG M2 Affinity Gel                                                                 | Sigma                | Cat#. A2220       |
| NeutrAvidin® Agarose Resin                                                                    | Thermo Scientific    | Cat#. 29200       |
| DHPG                                                                                          | Tocris               | Cat#. 0342        |
| Biotinylated actin (rabbit skeletal muscle)                                                   | Cytoskeleton, Inc    | Cat#. CY-AB07-A   |
| Actin protein (rabbit skeletal muscle)                                                        | Cytoskeleton, Inc    | Cat#. CY-AKL95    |
| Puromycin dihydrochloride                                                                     | Sigma                | P8833             |
| EasyTag™ EXPRESS35S Protein Labeling Mix                                                      | PerkinElmer          | Cat#. NEG772002MC |
| <b>Critical Commercial Assays</b>                                                             |                      |                   |
| NucleoSpin Plasmid kit                                                                        | Cultek               | Cat#. 22740588    |
| Nucleobond Xtra Midi Plus EF kit                                                              | Cultek               | Cat#. 22740422    |
| Lipotransfectine                                                                              | Attendbio            | Cat#. LTF-1ml     |
| CalPhos™ Mammalian Transfection Kit                                                           | Clontech             | Cat#. 631312      |
| <b>Experimental Models: Cell Lines</b>                                                        |                      |                   |
| HEK293T                                                                                       | ATCC                 | Cat#. CRL-3216    |
| Neuro-2a                                                                                      | ATCC                 | Cat#. CCL-131     |
| Neuro-2a <i>shEF1A2</i>                                                                       | This paper           | N/A               |
| <b>Experimental Models: Organisms/Strains</b>                                                 |                      |                   |
| Mouse SWISS                                                                                   | Janvier Labs         | N/A               |
| Rat Sprague Dawley                                                                            | Janvier Labs         | N/A               |
| <b>Software and Algorithms</b>                                                                |                      |                   |
| SpineJ                                                                                        | Pedraza et al., 2014 | imagej.nih.gov    |
| FRETmapJ                                                                                      | This paper           | N/A               |
| MaxQuant software package with Perseus                                                        | Mann's lab           | maxquant.org      |
| TheCellMap.org                                                                                | Usaj et al., 2017    | thecellmap.org/   |
| <b>Yeast strains</b>                                                                          |                      |                   |
| CGG1428 ( <i>ABP140-GFP::TRP1 ABP1-mCh::HYG METp-TEF2::KAN <math>\Delta</math>tef1::NAT</i> ) | This paper           | N/A               |
| <b>Others</b>                                                                                 |                      |                   |
| Zeiss LSM780 Confocal Multiphoton Microscope                                                  | Zeiss                | N/A               |
| LTQ-Orbitrap XL mass spectrometer                                                             | Thermo Scientific    | N/A               |

3

4

**Table 1. Plasmids used in this study**

|                              |                 |
|------------------------------|-----------------|
| pcDNA3-FLAG                  | Our lab stocks  |
| pCGG907 (FLAG-eEF1A2 wt)     | This paper      |
| pCGG909 (FLAG-eEF1A2 SA)     | This paper      |
| pCGG910 (FLAG-eEF1A2 SE)     | This paper      |
| pcDNA3-HA                    | Our lab stocks  |
| pCGG744 (HA-eEF1A2 wt)       | This paper      |
| pCGG808 (HA-eEF1A2 SA)       | This paper      |
| pCGG830 (HA-eEF1A2 SE)       | This paper      |
| pEGFP-C3                     | Addgene 6082-1  |
| pCGG1445 (GFP-eEF1A2 wt)     | This paper      |
| pCGG1525 (GFP-eEF1A2 SA)     | This paper      |
| pCGG1526 (GFP-eEF1A2 SE)     | This paper      |
| pCGG2457 (mGFP)              | This paper      |
| pCGG2451 (mGFP-eEF1A2 wt)    | This paper      |
| pCGG2452 (mGFP-eEF1A2 SA)    | This paper      |
| pCGG2453 (mGFP-eEF1A2 SE)    | This paper      |
| pET-28A                      | Novagen 69864-3 |
| pCGG1728 (pET-28A-eEF1A2 SA) | This paper      |
| pCGG1731 (pET-28A-eEF1A2 SE) | This paper      |
| pCYC777 (HA-eEF1B2)          | This paper      |
| pmScarlet-C1                 | Addgene 85044   |
| pCGG2440 (pmScarlet-eEF1B2)  | This paper      |
| pCGG2563 (mScarlet-actin)    | This paper      |
| LifeAct-mCherry              | Addgene 40908   |
| DsRed2                       | Clontech 632404 |
| pCGG1187 (TEF1 wt)           | This paper      |
| pCGG1188 (TEF1 S356A)        | This paper      |
| pCGG1196 (TEF1 S356E)        | This paper      |
| YEp195                       | Our lab stocks  |

**1 Table 2. Oligonucleotides used in this study**

| <i>Vectors</i>                           | <i>Type</i> | <i>Sequence 5' - 3'</i>             |
|------------------------------------------|-------------|-------------------------------------|
| pCGG744, 808, 830<br>(HA-eEF1A2)         | Forward     | GCGCGGAATCAAATGGGCAAGGAGAAGAC       |
|                                          | Reverse     | GCGCGCTCGAGTCACTTGCCCGCCTTC         |
| pCGG1445,1525,1526<br>(GFP-eEF1A2)       | Forward     | GCGCCTCGAGATGGGCAAGGAGAAGAC         |
|                                          | Reverse     | CGCGGAATTCTCACTTGCCCGCTTTC          |
| pCGG1728, 1731<br>(His-eEF1A2 SA/SE)     | Forward     | GCGCGGAATTCGGCAAGGAGAAGACACACATC    |
|                                          | Reverse     | GCGCGCTCGAGTCACTTGCCCGCTTCTGAG      |
| pCGG2451,2452, 2453 2457<br>*mGFP-eEF1A2 | Forward     | CACCCAGTCCAAGCTGAGCAAAGACCCCAACGAG  |
|                                          | Reverse     | AGCTTGGACTGGGTGCTCAGGTAGTGGTTGTCCG  |
| pCGG2440<br>(mScarlet-eEF1B2)            | Forward     | GATATCGAATTCTGGATTTCGGAGACCTGAAAC   |
|                                          | Reverse     | GATATCGGATCCTTAAATCTTGTTAAAAGCAGCCA |

2

|                           |         |                                   |
|---------------------------|---------|-----------------------------------|
| pCGG2563 (mScarlet-actin) | Forward | GAATTCCTCGAGCTGATGACGATATCGCTGCGC |
|                           | Reverse | GAATTCGGATCCCTAGAAGCACTTGCGGTGC   |
| <i>Mm eEF1A1</i>          | Forward | GAGCCAAGTGCTAATATG                |
|                           | Reverse | TGGTGGTAGGATAACAATC               |
|                           | Probe   | AAAGTCACCCGCAAAGATGGC             |
| <i>Mm eEF1A2</i>          | Forward | CATGGTGACAACATGCTG                |
|                           | Reverse | GCTTGCATTTCTTCCTTA                |
|                           | Probe   | ATGGTTCAAGGGCTGGAAAGTAGA          |
| <i>Mm shEF1A2</i>         | Target  | CAAAGTCCAGTGAAATTCTT              |

1

2 \*Site-directed mutagenesis primers for monomeric GFP (EGFP with A206K mutation)

3 **Primary dissociated cultures.** Animal experimental procedures were approved by the ethics

4 committee of the Research Council of Spain (CSIC). Neurons were cultured as previously described

5 (Pedraza et al., 2014). Briefly, hippocampi and cortex were isolated from E17 mouse embryos and

6 digested with 0.05% trypsin at 37°C for 15 min. Dissociated cells were suspended in DMEM + 10%

7 FBS + 0.6% glucose, and plated at a density of  $5 \times 10^4$  cells/cm<sup>2</sup> for biochemistry and  $2 \times 10^4$  cells/cm<sup>2</sup>

8 for imaging experiments onto poly-D-lysine-coated plates. Medium was replaced 2 h after initial

9 incubation with neurobasal medium (ThermoFisher, 21103049) supplemented with 2% B-27

10 supplement (ThermoFisher, 17504044), 1% GlutaMax (ThermoFisher, 35050061), and 1%

11 penicillin/streptomycin. Neurons were placed in incubators at 37°C in 5% CO<sub>2</sub>. Medium was changed

12 by half every 3 days.

13 **Hippocampal slice culture.** Hippocampal organotypic slice cultures were prepared from postnatal

14 day 6-7 rats as described (Bosch et al., 2014).

15 **Cell lines.** HEK293T and Neuro-2a cells were grown in DMEM (Biowest, L0104) supplemented with

16 10% FBS (GE Healthcare Hyclone, 12350273).

17 **Yeast cells and cultures.** Methods used for chromosomal gene transplacement were as previously

18 described (Ferrezuelo et al., 2010). Cells were grown in SC medium with 2% glucose at 30°C without

19 methionine to allow *MET2p-TEF2* expression, which was turned off by addition of methionine to 0.1

20 mg/ml when indicated.

21 **Gene transfection.** Primary dissociated hippocampal neurons were transfected at 14 DIV using

22 CalPhos mammalian transfection kit (Clontech) as previously described in Jiang and Chen, 2006 and

23 analyzed 16h later. Organotypic slices cultures were biolistically transfected (BioRad) at 5-7 DIV and

24 imaged 3-5 days later (Bosch et al., 2014). HEK239T and Neuro-2a were transfected using

25 Lipotransfectine (AttendBio) according to the manufacturer's protocol.

26

1 **DNA constructs.** Site-directed mutagenesis in eEF1A cDNAs were performed by In-Fusion HD  
2 (Clontech), except domain III sequence containing the four mutations that was synthesized by  
3 GeneCustom. pcDNA3Flag5', pcDNA3-6His-3HA, pEGFP-C3, pmScarlet-C1 and pET28A were used as  
4 host vectors. Plasmids were prepared using NucleoSpin Plasmid kit (Cultek) for cell line transfections  
5 and Nucleobond Xtra Midi Plus EF kit (Cultek) for neuron transfections.

6 **Real-time PCR analysis.** Methods used for quantitative PCR have been described (Pedraza et al.,  
7 2014). Total RNA was isolated using E.Z.N.A. Total RNA Kit I (Omega Bio-tek) following the  
8 manufacturer's instructions. All samples were treated with RNase-free DNase I (Thermo Scientific),  
9 and DNA contamination levels were assessed by qRT-PCR, omitting reverse transcriptase.

10 **Immunoblots and immunoprecipitations.** Western blot analysis (Pedraza et al., 2014) was carried  
11 out with antibodies  $\alpha$ eEF1A (Millipore, 1:1000),  $\alpha$ eEF1A2 (Abyntek, 1:1000),  $\alpha$ eEF1A2 (Ser358)  
12 (Phosphosolutions, 1:500),  $\alpha$ FLAG (Sigma, 1:1000),  $\alpha$ HA (Roche, 1:500), IRDye 800 (Li-Cor 1:10000),  
13 IRDye 680 (Li-Cor 1:10000), and streptavidin (LI-COR Biosciences 1:1000). Cell lysates from HEK293T  
14 cells were immunoprecipitated with  $\alpha$ FLAG-agarose (Sigma).

15 **Interaction with actin.** Actin pull-down *in vivo*. HEK293T cells were transfected with FLAG-eEF1A2  
16 constructs, 24h post-transfection cells were harvested in collection buffer (20 mM Tris-HCl (pH 7.5),  
17 50 mM KCl, 2 mM MgCl<sub>2</sub>, 1 mM ATP, 1% triton, 0.2 Mm DTT, 2 mM EGTA, and cComplete EDTA-free  
18 and PhosSTOP from Roche). Supernatants were incubated with biotinylated-actin (Cytoskeleton, Inc),  
19 previously prepared as indicated by the manufacturer's. NeutrAvidin agarose resin was used to  
20 pulldown actin complexes.

21 Co-sedimentation assay *in vitro*. F-actin bundling assay was carried out with purified eEF1A2 proteins  
22 from *E.coli* and lowspeed centrifugation. Actin was polymerized in the presence of 50 mM KCl, 2 mM  
23 MgCl<sub>2</sub> and 1 mM ATP according to the manufacturer's protocol. Recombinant proteins were  
24 incubated with F-actin for 30 min at RT and centrifuged at 4000g for 5 min to separate unbundled  
25 and bundled F-actin. Proteins were separated on SDS-PAGE and stained with Coomassie Brilliant  
26 Blue.

27 **Mass spectrometry based interactomic analysis.** HEK293T cells were transfected with FLAG-eEF1A2  
28 SA and FLAG-eEF1A2 SE expressing plasmids, and triplicate samples were immunoprecipitated using  
29  $\alpha$ FLAG-agarose beads (Sigma). FLAG immunoprecipitates (~150  $\mu$ g protein) were reduced with 100  
30 mM DTT at 95°C for 10 min, before being subjected to trypsin digestion using the Filter Aided Sample  
31 Preparation (FASP) protocol (Hau et al., 2020). Peptides were analysed using a LTQ-Orbitrap XL mass  
32 spectrometer (Barts Cancer Institute, London). MaxQuant (version 1.6.3.3) software was used for  
33 database search and label-free quantification of mass spectrometry raw files. The search was  
34 performed against a FASTA file of the *Mus musculus* proteome, extracted from uniprot.org. All  
35 downstream data analysis was performed using Perseus (version 1.5.5.3).

1 **Yeast growth rate in G1.** Volume growth of yeast cells in G1 phase was measured by time-lapse  
2 microscopy in 35-mm glass-bottom culture dishes (GWST-3522, WillCo) essentially as described  
3 (Ferrezuelo et al., 2010) using a fully-motorized Leica AF7000 microscope.

4 **Protein synthesis measurements by pulse labeling.** Strain CGG1428 expressing wild-type and mutant  
5 forms of eEF1A were grown as liquid cultures (100 ml) in medium lacking methionine at 30°C to  
6  $OD_{600} = 0.2$ . Unlabeled methionine was then added to 50 mM to repress endogenous *TEF2* expression  
7 and 0, 3 and 6 hr later cells were labeled for 5 min with 1 mCi/ml  $^{35}\text{S}$  Protein Labeling Mix  
8 (PerkinElmer). Lysates from 25-ml culture triplicate samples were analyzed by SDS-PAGE and  
9 autoradiography.

10 **Puromycin incorporation.** Neuro-2a cells stably expressing an shRNA against endogenous the eEF1A2  
11 mRNA were cultured on glass coverslips and transfected with GFP co-expressed with HA-eEF1A2  
12 phosphomutants. 24 hours after transfection cells were treated with 1  $\mu\text{g}/\text{ml}$  puromycin (Sigma)  
13 during 5 minutes and fixed in 4% paraformaldehyde in PBS. Immunofluorescence was performed as  
14 previously described (Pedraza et al., 2014), using  $\alpha$ -puromycin (Millipore, 1:250) as primary antibody.  
15 Images were acquired with a Zeiss LSM780 confocal microscope. Immunofluorescence quantification  
16 was performed using ImageJ (Wayne Rasband, NIH). Puromycin incorporation was determined by  
17 measuring fluorescent intensity over the whole cell in transfected cells.

18 **FLIP imaging.** FLIP was used as a quantitative assay to determine the stability of actin cables in yeast  
19 cells at room temperature in a Zeiss LSM780 confocal microscope equipped with a 40x1.2NA water-  
20 immersion objective. A small circular region of the cell, either at the bud neck or at the opposite  
21 pole, was repetitively photobleached at full laser power while the cell was imaged at low intensity  
22 every 0.5 s to record fluorescence loss. After background subtraction, fluorescence data from an  
23 unbleached medial cell region were made relative to the initial time point, and a bleaching rate index  
24 was calculated as the inverse of the fluorescence half-life obtained by fitting an exponential function.

25 **Fluorescence fluctuation analysis.** Hippocampal neurons were transfected with plasmids expressing  
26 GFP-eEF1A2 and LifeAct-mCherry. Fluorescence fluctuations were analyzed by time-lapse photon-  
27 counting microscopy using a Zeiss LSM780 confocal microscope with a 40 x 1.3 NA oil-immersion  
28 objective. Imaged regions were 248 x 100 pixels, with a pixel width of 86 nm/pixel at 13.0  $\mu\text{s}/\text{pixel}$ .

29 **FRAP imaging.** 14 DIV hippocampal neurons cultured on 35 mm glass-bottom dishes (Ibidi) at  $1.4 \times$   
30  $10^5$  cells/dish were transfected with plasmids expressing mScarlet-actin and SA or SE GFP-eEF1A2  
31 proteins and analyzed 24h later. Live imaging was performed using Zeiss LSM780 confocal  
32 microscope equipped with a 5%  $\text{CO}_2$ , 37°C humidified chamber under a 40x1.2 water objective.  
33 Photo-bleaching was achieved with 3 continues scans at maximum laser (561nm) power after 3  
34 baseline images. Images were taken in 1 s intervals during 1 min. Photobleaching during the pre- and  
35 post-bleaching stages was negligible. FRAP efficiency was calculated using ImageJ. ROIs were placed



1 on individual (bleached) spines and non-bleached dendritic sections as control. Intensity values for  
2 spines were background subtracted and normalized to the average of the three pre-bleaching  
3 frames. Data were fitted to a single-term exponential recovery model as described (Koulouras et al.,  
4 2018).

5 **FRET imaging.** Hippocampal cultures were transfected at 14 DIV with FRET biosensor plasmids  
6 expressing mGFP-eEF1A2 proteins and pmScarlet-eEF1B2. Time-lapse images were conducted 16h  
7 post-transfection. For neuronal stimulation experiments, hippocampal cultures were stimulated with  
8 50  $\mu$ M DHPG and images to calculate FRET efficiency were recorded every 2 min during 15 min at  
9 37°C in 5% CO<sub>2</sub>. Neurons were imaged using a Zeiss LSM780 confocal microscope with a 40 x 1.2 NA  
10 water-immersion objective. Images were 1024 x 1024 pixels, with a pixel width of 65 nm. Briefly,  
11 donor (mGFP-eEF1A2) proteins were excited at 488 nm, and its emission was measured at 490-532  
12 nm ( $I_D$ ). Excitation of the acceptor (pmScarlet-eEF1B2) was at 561 nm, and emission was measured at  
13 563-695 nm ( $I_A$ ). We also measured the total signal emitted at 563-695 when excited at 488 nm ( $I_F$ ) to  
14 obtain the FRET efficiency as  $F\% = 100 * (I_F - k_D * I_D - k_A * I_A) / I_A$ ,  $k_D$  and  $k_A$  correcting acceptor cross-  
15 excitation and donor bleed-through, respectively, with the aid of FRETmapJ, a plugin that also  
16 provides maps with the FRET signal as pixel value for local quantification.

17 **Statistical analysis.** Number of samples is described in the figure legends. Single spine data is  
18 displayed as median and quartile (Q) values. Pairwise comparisons were performed with a Mann-  
19 Whitney U test; and the resulting p values are shown in the corresponding figure panels. DHPG  
20 stimulation FRET data recorded from single spine during stimulation are represented as the mean  
21 value of the population along time, while the shadowed area represents the 95% confidence limits of  
22 the mean. Protein levels by immunoblotting and mRNA levels by RT-PCR were determined in  
23 triplicate samples and mean  $\pm$  SEM values are shown.

24 **Data and software availability.** SpineJ (Pedraza et al., 2014), BudJ (Ferrezuelo et al., 2010) and  
25 FRETmapJ can be obtained as ImageJ (Wayne Rasband, NIH) plugins from  
26 [ibmb.csic.es/groups/spatial-control-of-cell-cycle-entry](http://ibmb.csic.es/groups/spatial-control-of-cell-cycle-entry). The global yeast genetic interaction network  
27 (Usaj et al., 2017) can be accessed at CellMap.org.

28  
29 **Acknowledgements.** We thank M. Kerexeta and L. Pérez for technical assistance, C. Caelles for  
30 generous providing plasmids and proteins, I. Fita and M. Aldea for helpful comments and C. Rose for  
31 editing the manuscript. We also thank members of M. Aldea and C. Gallego laboratories for  
32 stimulating discussions and ideas. D.F.M. received a FI fellowship from Generalitat de Catalunya. This  
33 work was funded by grants from the Ministry of Economy and Competitiveness of Spain and the  
34 European Union (FEDER) (BFU2017-83375-R) to C.G.

35

1 **Author contributions.** M.B.M., S.G., R.O., and C.G. built genetic constructs, primary cell cultures and  
2 performed the experiments. D.F.M. designed and performed yeast experiments. M.D., M.D. and  
3 F.K.M. contributed to mass spectrometry experiments. E.R. contributed to imaging experiments.  
4 M.B. carried out organotypic cultures. M.B.M., S.G. and C.G. conceived the study. C.G. analyzed the  
5 data and wrote the manuscript.

6

7 **Competing interests:** The authors declare that no competing interests exist.

8

## 9 **References**

- 10 Abbas W, Kumar A, Herbein G. 2015. The eEF1A Proteins: At the Crossroads of Oncogenesis,  
11 Apoptosis, and Viral Infections. *Front Oncol* **5**:75. doi:10.3389/fonc.2015.00075
- 12 Amiri A, Noei F, Jeganathan S, Kulkarni G, Pinke DE, Lee JM. 2007. eEF1A2 activates Akt and  
13 stimulates Akt-dependent actin remodeling, invasion and migration. *Oncogene* **26**:3027–3040.  
14 doi:10.1038/sj.onc.1210101
- 15 Andersen GR, Pedersen L, Valente L, Chatterjee I, Kinzy TG, Kjeldgaard M, Nyborg J. 2000. Structural  
16 basis for nucleotide exchange and competition with tRNA in the Yeast elongation factor  
17 complex eEF1A:eEF1B $\alpha$ . *Mol Cell* **6**:1261–1266. doi:10.1016/S1097-2765(00)00122-2
- 18 Andersen GR, Valente L, Pedersen L, Kinzy TG, Nyborg J. 2001. Crystal structures of nucleotide  
19 exchange intermediates in the eEF1A-eEF1B $\alpha$  complex. *Nat Struct Biol* **8**:531–534.  
20 doi:10.1038/88598
- 21 Bear MF, Huber KM, Warren ST. 2004. The mGluR theory of fragile X mental retardation. *Trends*  
22 *Neurosci* **27**:370–377. doi:10.1016/j.tins.2004.04.009
- 23 Biever A, Glock C, Tushev G, Ciirdaeva E, Dalmay T, Langer JD, Schuman EM. 2020. Monosomes  
24 actively translate synaptic mRNAs in neuronal processes. *Science (80- )* **367**:eaay4991.  
25 doi:10.1126/science.aay4991
- 26 Bosch M, Castro J, Saneyoshi T, Matsuno H, Sur M, Hayashi Y. 2014. Structural and molecular  
27 remodeling of dendritic spine substructures during long-term potentiation. *Neuron* **82**:444–459.  
28 doi:10.1016/j.neuron.2014.03.021
- 29 Bunai F, Ando K, Ueno H, Numata O. 2006. Tetrahymena eukaryotic translation elongation factor 1A  
30 (eEF1A) bundles filamentous actin through dimer formation. *J Biochem* **140**:393–399.  
31 doi:10.1093/jb/mvj169
- 32 Chambers DM, Peters J, Abbott CM. 1998. The lethal mutation of the mouse wasted (wst) is a  
33 deletion that abolishes expression of a tissue-specific isoform of translation elongation factor  
34 1 $\alpha$ , encoded by the Eef1a2 gene. *Proc Natl Acad Sci U S A* **95**:4463–4468.  
35 doi:10.1073/pnas.95.8.4463
- 36 Chotiner JK, Khorasani H, Nairn AC, O'Dell TJ, Watson JB. 2003. Adenylyl cyclase-dependent form of  
37 chemical long-term potentiation triggers translational regulation at the elongation step.  
38 *Neuroscience* **116**:743–752. doi:10.1016/S0306-4522(02)00797-2
- 39 Cingolani L, Goda Y. 2008. Actin in action: the interplay between the actin cytoskeleton and synaptic  
40 efficacy. *Nat Rev Neurosci* **9**:344–356. doi:10.1038/nrn2410
- 41 DeRubeis S, Pasciuto E, Li KW, Fernández E, DiMarino D, Buzzi A, Ostroff LE, Klann E, Zwartkruis FJT,  
42 Komiyama NH, Grant SGN, Pujol C, Choquet D, Achsel T, Posthuma D, Smit AB, Bagni C. 2013.  
43 CYFIP1 coordinates mRNA translation and cytoskeleton remodeling to ensure proper dendritic  
44 Spine formation. *Neuron* **79**:1169–1182. doi:10.1016/j.neuron.2013.06.039
- 45 Di Prisco GV, Huang W, Buffington SA, Hsu CC, Bonnen PE, Placzek AN, Sidrauski C, Krnjević K,  
46 Kaufman RJ, Walter P, Costa-Mattioli M. 2014. Translational control of mGluR-dependent long-  
47 term depression and object-place learning by eIF2 $\alpha$ . *Nat Neurosci* **17**:1073–1082.

- 1 doi:10.1038/nn.3754
- 2 Digman MA, Gratton E. 2012. Scanning image correlation spectroscopy. *BioEssays* **34**:377–385.
- 3 doi:10.1002/bies.201100118
- 4 Edmonds BT, Wyckoff J, Yeung YG, Wang Y, Stanley ER, Jones J, Segall J, Condeelis J. 1996. Elongation
- 5 factor-1 $\alpha$  is an overexpressed actin binding protein in metastatic rat mammary
- 6 adenocarcinoma. *J Cell Sci* **109**:2705–2714.
- 7 Ferrezuelo F, Colomina N, Futch B, Aldea M. 2010. The transcriptional network activated by Cln3
- 8 cyclin at the G1-to-S transition of the yeast cell cycle. *Genome Biol* **11**. doi:10.1186/gb-2010-11-
- 9 6-r67
- 10 Forrest MP, Parnell E, Penzes P. 2018. Dendritic structural plasticity and neuropsychiatric disease.
- 11 *Nat Rev Neurosci* **19**:215–234. doi:10.1038/nrn.2018.16
- 12 Gal-Ben-Ari S, Kenney JW, Ounalla-Saad H, Taha E, David O, Levitan D, Gildish I, Panja D, Pai B,
- 13 Wibrand K, Simpson TI, Proud CG, Bramham CR, Armstrong JD, Rosenblum K. 2012.
- 14 Consolidation and translation regulation. *Learn Mem* **19**:410–22. doi:10.1101/lm.026849.112
- 15 Gandin V, Gutierrez GJ, Brill LM, Varsano T, Feng Y, Aza-Blanc P, Au Q, McLaughlan S, Ferreira TA,
- 16 Alain T, Sonenberg N, Topisirovic I, Ronai ZA. 2013. Degradation of Newly Synthesized
- 17 Polypeptides by Ribosome-Associated RACK1/c-Jun N-Terminal Kinase/Eukaryotic Elongation
- 18 Factor 1A2 Complex. *Mol Cell Biol* **33**:2510–2526. doi:10.1128/mcb.01362-12
- 19 Giese KP, Mizuno K. 2013. The roles of protein kinases in learning and memory. *Learn Mem* **20**:540–
- 20 552. doi:10.1101/lm.028449.112
- 21 Gross SR. 2013. Actin binding proteins: Their ups and downs in metastatic life. *Cell Adhes Migr* **7**:199–
- 22 213. doi:10.4161/cam.23176
- 23 Gross SR, Kinzy TG. 2007. Improper organization of the actin cytoskeleton affects protein synthesis at
- 24 initiation. *Mol Cell Biol* **27**:1974–89. doi:10.1128/MCB.00832-06
- 25 Gross SR, Kinzy TG. 2005. Translation elongation factor 1A is essential for regulation of the actin
- 26 cytoskeleton and cell morphology. *Nat Struct Mol Biol* **12**:772–778. doi:10.1038/nsmb979
- 27 Hau HTA, Ogundele O, Hibbert AH, Monfries CAL, Exelby K, Wood NJ, Nevarez-Mejia J, Carbajal MA,
- 28 Fleck RA, Dermit M, Mardakheh FK, Williams-Ward VC, Pipalia TG, Conte MR, Hughes SM. 2020.
- 29 Maternal Larp6 controls oocyte development, chorion formation and elevation. *Dev*
- 30 **147**:dev187385. doi:10.1242/dev.187385
- 31 Heyer EE, Moore MJ. 2016. Redefining the Translational Status of 80S Monosomes. *Cell* **164**:757–769.
- 32 doi:10.1016/j.cell.2016.01.003
- 33 Holtmaat A, Svoboda K. 2009. Experience-dependent structural synaptic plasticity in the mammalian
- 34 brain. *Nat Rev Neurosci* **10**:647–658. doi:10.1038/nrn2699
- 35 Hong T, Yang H, Zhang SS, Cho HC, Kalashnikova M, Sun B, Zhang H, Bhargava A, Grabe M, Olgin J,
- 36 Gorelik J, Marbán E, Jan LY, Shaw RM. 2014. Cardiac BIN1 folds T-tubule membrane, controlling
- 37 ion flux and limiting arrhythmia. *Nat Med* **20**:624–632. doi:10.1038/nm.3543
- 38 Huang W, Zhu PJ, Zhang S, Zhou H, Stoica L, Galiano M, Krnjević K, Roman G, Costa-Mattioli M. 2013.
- 39 MTORC2 controls actin polymerization required for consolidation of long-term memory. *Nat*
- 40 *Neurosci* **16**:441–448. doi:10.1038/nn.3351
- 41 Jiang M, Chen G. 2006. High Ca<sup>2+</sup>-phosphate transfection efficiency in low-density neuronal cultures.
- 42 *Nat Protoc* **1**:695–700. doi:10.1038/nprot.2006.86
- 43 Kalinowska M, Chávez AE, Lutz S, Castillo PE, Bukauskas FF, Francesconi A. 2015. Actinin-4 governs
- 44 dendritic spine dynamics and promotes their remodeling by metabotropic glutamate receptors.
- 45 *J Biol Chem* **290**:15909–15920. doi:10.1074/jbc.M115.640136
- 46 Kapur M, Monaghan CE, Ackerman SL. 2017. Regulation of mRNA Translation in Neurons—A Matter
- 47 of Life and Death. *Neuron* **96**:616–637. doi:10.1016/j.neuron.2017.09.057
- 48 Kenney JW, Moore CE, Wang X, Proud CG. 2014. Eukaryotic elongation factor 2 kinase, an unusual
- 49 enzyme with multiple roles. *Adv Biol Regul* **55**:15–27. doi:10.1016/j.jbior.2014.04.003
- 50 Khalyfa A, Bourbeau D, Chen E, Petroulakis E, Pan J, Xu S, Wang E. 2001. Characterization of
- 51 Elongation Factor-1A (eEF1A-1) and eEF1A-2/S1 Protein Expression in Normal and wasted Mice.
- 52 *J Biol Chem* **276**:22915–22922. doi:10.1074/jbc.M101011200

- 1 Kim K, Lakhanpal G, Lu HE, Khan M, Suzuki A, Kato-Hayashi M, Narayanan R, Luyben TT, Matsuda T,  
2 Nagai T, Blanpied TA, Hayashi Y, Okamoto K. 2015. A Temporary Gating of Actin Remodeling  
3 during Synaptic Plasticity Consists of the Interplay between the Kinase and Structural Functions  
4 of CaMKII. *Neuron* **87**:813–826. doi:10.1016/j.neuron.2015.07.023
- 5 Kim S, Coulombe PA. 2010. Emerging role for the cytoskeleton as an organizer and regulator of  
6 translation. *Nat Rev Mol Cell Biol* **11**:75–81.
- 7 Koulouras G, Panagopoulos A, Rapsomaniki MA, Giakoumakis NN, Taraviras S, Lygerou Z. 2018.  
8 EasyFRAP-web: A web-based tool for the analysis of fluorescence recovery after photobleaching  
9 data. *Nucleic Acids Res* **46**:W467–W472. doi:10.1093/nar/gky508
- 10 Lee S, LeBlanc A, Duttaroy A, Wang E. 1995. Terminal differentiation-dependent alteration in the  
11 expression of translation elongation factor-1 alpha and its sister gene, S1, in neurons. *Exp Brain*  
12 *Res* **219**:589–597.
- 13 Lewis YE, Moskovitz A, Mutlak M, Heineke J, Caspi LH, Kehat I. 2018. Localization of transcripts,  
14 translation, and degradation for spatiotemporal sarcomere maintenance. *J Mol Cell Cardiol*  
15 **116**:16–28. doi:10.1016/j.yjmcc.2018.01.012
- 16 Liu G, Grant WM, Persky D, Vaughan M, Latham J, Singer RH, Condeelis J. 2002. Interactions of  
17 Elongation Factor 1 with F-Actin and Actin mRNA: Implications for Anchoring mRNA in Cell  
18 Protrusions. *Mol Biol Cell* **13**:579–592.
- 19 Liu G, Tang J, Edmonds BT, Murray J, Levin S, Condeelis J. 1996. F-actin Sequesters Elongation Factor  
20 1 $\alpha$  from Interaction with Aminoacyl-tRNA in a pH-dependent Reaction. *J Cell Biol* **135**:953–963.  
21 doi:10.1083/jcb.135.4.953
- 22 Mardakheh FK, Paul A, Kümper S, Sadok A, Paterson H, Mccarthy A, Yuan Y, Marshall CJ. 2015. Global  
23 Analysis of mRNA, Translation, and Protein Localization: Local Translation Is a Key Regulator of  
24 Cell Protrusions. *Dev Cell* **35**:344–357. doi:10.1016/j.devcel.2015.10.005
- 25 Marin P, Nastiuk KL, Daniel N, Girault JA, Czernik AJ, Glowinski J, Nairn AC, Prémont J. 1997.  
26 Glutamate-dependent phosphorylation of elongation factor-2 and inhibition of protein  
27 synthesis in neurons. *J Neurosci* **17**:3445–54.
- 28 Mateyak MK, Kinzy TG. 2010. eEF1A: Thinking outside the ribosome. *J Biol Chem* **285**:21209–21213.  
29 doi:10.1074/jbc.R110.113795
- 30 Muddashetty RS, Kelić S, Gross C, Xu M, Bassell GJ. 2007. Dysregulated metabotropic glutamate  
31 receptor-dependent translation of AMPA receptor and postsynaptic density-95 mRNAs at  
32 synapses in a mouse model of fragile X syndrome. *J Neurosci* **27**:5338–5348.  
33 doi:10.1523/JNEUROSCI.0937-07.2007
- 34 Nakahata Y, Yasuda R. 2018. Plasticity of spine structure: Local signaling, translation and cytoskeletal  
35 reorganization. *Front Synaptic Neurosci* **10**:1–13. doi:10.3389/fnsyn.2018.00029
- 36 Negrutskii B, Vlasenko D, El'Skaya A. 2012. From global phosphoproteomics to individual proteins:  
37 The case of translation elongation factor eEF1A. *Expert Rev Proteomics* **9**:71–83.  
38 doi:10.1586/epr.11.71
- 39 Negrutskii BS, El'skaya A V. 1998. Eukaryotic Translation Elongation Factor 1 $\alpha$ : Structure, Expression,  
40 Functions, and Possible Role in Aminoacyl-tRNA Channeling. *Prog Nucleic Acid Res Mol Biol*  
41 **60**:47–78. doi:10.1016/S0079-6603(08)60889-2
- 42 Nelson CD, Kim MJ, Hsin H, Chen Y, Sheng M. 2013. Phosphorylation of threonine-19 of PSD-95 by  
43 GSK-3 $\beta$  is required for PSD-95 mobilization and long-term depression. *J Neurosci* **33**:12122–  
44 12135. doi:10.1523/JNEUROSCI.0131-13.2013
- 45 Newbery HJ, Loh DH, O'Donoghue JE, Tomlinson VAL, Chau YY, Boyd JA, Bergmann JH, Brownstein D,  
46 Abbott CM. 2007. Translation elongation factor eEF1A2 is essential for post-weaning survival in  
47 mice. *J Biol Chem* **282**:28951–28959. doi:10.1074/jbc.M703962200
- 48 Pan J, Ruest LB, Xu S, Wang E. 2004. Immuno-characterization of the switch of peptide elongation  
49 factors eEF1A-1/EF-1 $\alpha$  and eEF1A-2/S1 in the central nervous system during mouse  
50 development. *Dev Brain Res* **149**:1–8. doi:10.1016/j.devbrainres.2003.10.011
- 51 Park S, Park JM, Kim S, Kim JA, Shepherd JD, Smith-Hicks CL, Chowdhury S, Kaufmann W, Kuhl D,  
52 Ryazanov AG, Haganir RL, Linden DJ, Worley PF. 2008. Elongation Factor 2 and Fragile X Mental

- 1 Retardation Protein Control the Dynamic Translation of Arc/Arg3.1 Essential for mGluR-LTD.  
2 *Neuron* **59**:70–83. doi:10.1016/j.neuron.2008.05.023
- 3 Pedraza N, Ortiz R, Cornado A, Llobet A, Aldea M, Gallego C. 2014. KIS, a Kinase Associated with  
4 Microtubule Regulators, Enhances Translation of AMPA Receptors and Stimulates Dendritic  
5 Spine Remodeling. *J Neurosci* **34**:13988–13997. doi:10.1523/JNEUROSCI.1573-14.2014
- 6 Perez WB, Kinzy TG. 2014. Translation elongation factor 1A mutants with altered actin bundling  
7 activity show reduced aminoacyl-tRNA binding and alter initiation via eIF2 $\alpha$  phosphorylation. *J*  
8 *Biol Chem* **289**:20928–20938. doi:10.1074/jbc.M114.570077
- 9 Piper M, Lee AC, van Horck FPG, McNeilly H, Lu TB, Harris WA, Holt CE. 2015. Differential  
10 requirement of F-actin and microtubule cytoskeleton in cue-induced local protein synthesis in  
11 axonal growth cones. *Neural Dev* **10**:1–13. doi:10.1186/s13064-015-0031-0
- 12 Pollard TD. 2016. Actin and Actin-Binding Proteins. *Cold Spring Harb Perspect Biol* **8**:a018226.
- 13 Santini E, Huynh TN, Longo F, Koo SY, Mojica E, D'Andrea L, Bagni C, Klann E. 2017. Reducing eIF4E-  
14 eIF4G interactions restores the balance between protein synthesis and actin dynamics in fragile  
15 X syndrome model mice. *Sci Signal* **10**:41–46. doi:10.1126/scisignal.aan0665
- 16 Sasikumar AN, Perez WB, Kinzy TG. 2012. The many roles of the eukaryotic elongation factor 1  
17 complex. *WIREs RNA* **3**:543–555. doi:10.1002/wrna.1118
- 18 Scaggiante B, Dapas B, Bonin S, Grassi M, Zennaro C, Farra R, Cristiano L, Siracusano S, Zanconati F,  
19 Giansante C, Grassi G. 2012. Dissecting the expression of EEF1A1/2 genes in human prostate  
20 cancer cells: The potential of EEF1A2 as a hallmark for prostate transformation and progression.  
21 *Br J Cancer* **106**:166–173. doi:10.1038/bjc.2011.500
- 22 Scheetz AJ, Nairn AC, Constantine-paton M. 2000. NMDA receptor-mediated control of protein  
23 synthesis at developing synapses. *Nat Neurosci* **3**:211–216.
- 24 Soares DC, Abbott CM. 2013. Highly homologous eEF1A1 and eEF1A2 exhibit differential post-  
25 translational modification with significant enrichment around localised sites of sequence  
26 variation. *Biol Direct* **8**:29. doi:10.1186/1745-6150-8-29
- 27 Soares DC, Barlow PN, Newbery HJ, Porteous DJ, Abbott CM. 2009. Structural models of human  
28 eEF1A1 and eEF1A2 reveal two distinct surface clusters of sequence variation and potential  
29 differences in phosphorylation. *PLoS One* **4**:e6315. doi:10.1371/journal.pone.0006315
- 30 Sonenberg N, Hinnebusch AG. 2009. Regulation of Translation Initiation in Eukaryotes: Mechanisms  
31 and Biological Targets. *Cell* **136**:731–745. doi:10.1016/j.cell.2009.01.042
- 32 Sossin WS, Costa-Mattioli M. 2019. Translational control in the brain in health and disease. *Cold*  
33 *Spring Harb Perspect Biol* **11**:1–18. doi:10.1101/cshperspect.a032912
- 34 Sutton MA, Taylor AM, Ito HT, Pham A, Schuman EM. 2007. Postsynaptic Decoding of Neural Activity:  
35 eEF2 as a Biochemical Sensor Coupling Miniature Synaptic Transmission to Local Protein  
36 Synthesis. *Neuron* **55**:648–661. doi:10.1016/j.neuron.2007.07.030
- 37 Tomlinson VAL, Newbery HJ, Wray NR, Jackson J, Larionov A, Miller WR, Dixon JM, Abbott CM. 2005.  
38 Translation elongation factor eEF1A2 is a potential oncoprotein that is overexpressed in two-  
39 thirds of breast tumours. *BMC Cancer* **5**:113–120. doi:10.1186/1471-2407-5-113
- 40 Truebestein L, Elsner DJ, Fuchs E, Leonard TA. 2015. A molecular ruler regulates cytoskeletal  
41 remodelling by the Rho kinases. *Nat Commun* **6**:10029. doi:10.1038/ncomms10029
- 42 Uesono Y, Ashe MP, Toh-E A. 2004. Simultaneous Yet Independent Regulation of Actin Cytoskeletal  
43 Organization and Translation Initiation by Glucose in *Saccharomyces Cerevisiae*. *Mol Biol Cell*  
44 **15**:1544–1556.
- 45 Umikawa M, Tanaka K, Kamei T, Shimizu K, Imamura H, Sasaki T, Takai Y. 1998. Interaction of Rho1p  
46 target Bni1p with F-actin-binding elongation factor 1 $\alpha$ : Implication in Rho1p-regulated  
47 reorganization of the actin cytoskeleton in *Saccharomyces cerevisiae*. *Oncogene* **16**:2011–2016.  
48 doi:10.1038/sj.onc.1201724
- 49 Usaj M, Tan Y, Wang W, VanderSluis B, Zou A, Myers CL, Costanzo M, Andrews B, Boone C. 2017.  
50 TheCellMap.org: A web-accessible database for visualizing and mining the global yeast genetic  
51 interaction network. *G3 Genes, Genomes, Genet* **7**:1539–1549. doi:10.1534/g3.117.040220
- 52 Vlahovich N, Kee AJ, Poel C Van der, Kettle E, Hernandez-Deviez D, Lucas C, Lynch GS, Parton RG,

- 1           Gunning PW, Hardeman EC. 2009. Cytoskeletal Tropomyosin Tm5NM1 Is Required for Normal  
2           Excitation-Contraction Coupling in Skeletal Muscle. *Mol Biol Cell* **20**:400–409.
- 3           Wang DO, Martin KC, Zukin RS. 2010. Spatially restricting gene expression by local translation at  
4           synapses. *Trends Neurosci* **33**:173–182. doi:10.1016/j.tins.2010.01.005
- 5           Waung MW, Huber KM. 2009. Protein translation in synaptic plasticity: mGluR-LTD, Fragile X. *Curr*  
6           *Opin Neurobiol* **19**:319–326. doi:10.1016/j.conb.2009.03.011
- 7           Yang H-C, Pon LA. 2002. Actin cable dynamics in budding yeast. *Proc Natl Acad Sci USA* **99**:751–756.  
8           doi:10.1073/pnas.022462899
- 9           Yang L, Mao L, Chen H, Catavsan M, Kozinn J, Arora A, Liu X, Wang JQ. 2006. A signaling mechanism  
10           from Gαq-protein-coupled metabotropic glutamate receptors to gene expression: Role of the c-  
11           Jun N-Terminal kinase pathway. *J Neurosci* **26**:971–980. doi:10.1523/JNEUROSCI.4423-05.2006  
12  
13

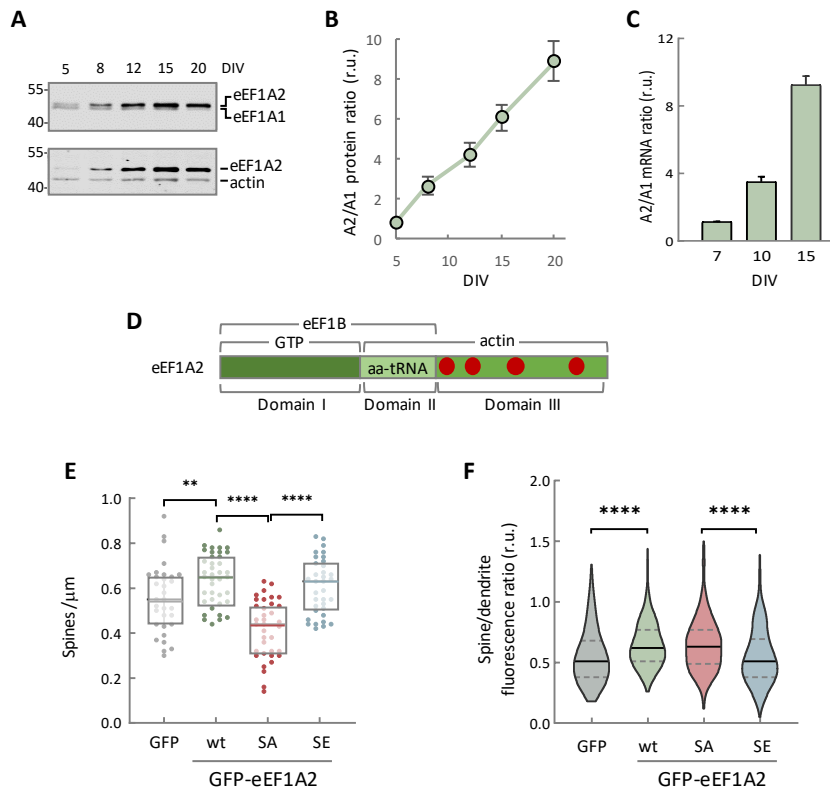

**Figure 1. eEF1A2 phosphosite configuration modulates spine growth**

(A) Differential expression of eEF1A isoforms in cultured hippocampal neurons from E17 mouse embryos. Samples were collected at different days *in vitro* (DIV) and analyzed by immunoblotting using a mouse monoclonal  $\alpha$ eEF1A (upper panel) or a rabbit polyclonal  $\alpha$ eEF1A2 (bottom panel).

(B) Quantification of eEF1A isoforms from immunoblot analysis as in panel A. eEF1A protein levels were normalized relative to actin. Ratios are represented as mean  $\pm$  SEM (n=3).

(C) Quantification of eEF1A isoform mRNA ratios from cultured hippocampal neurons by qRT-PCR. Bars represent mean  $\pm$  SEM (n=3).

(D) Scheme showing the three domains of eEF1A2 and relevant protein interactions. Red dots represent phosphorylation sites in domain III that are not present in eEF1A1. See Figure 1—figure supplement 1A for full details.

(E) Quantification of spine density in CA1 pyramidal neurons. Organotypic hippocampal slices were transfected with plasmids expressing GFP or GFP-fusions of wt, SA or SE eEF1A2 proteins, and a plasmid expressing RFP (DsRed2) for dendritic tracing. Changes in spine number were assessed by analyzing GFP-positive neurons with SpineJ software (Pedraza et al., 2014). The total number of observations (spines/neurons) plotted is as follows: GFP, n=834/32; wt, n=1387/39; SA, n=780/36; SE, n=938/35. Single-neuron data (dots) from three independent experiments and median  $\pm$  Q values are plotted. The results of Mann-Whitney tests (\*\* p<0.01; \*\*\*\* p<0.0001) are also indicated.

(F) Quantification of GFP-fused wt, SA and SE eEF1A2 proteins in spines of CA1 pyramidal neurons. GFP fluorescence in spines was normalized to that in corresponding dendritic shafts. The total number of observations (spines/neurons) plotted is as follows: GFP, n=259/10; wt, n=364/10; SA, n=313/12; SE, n=534/13. Median  $\pm$  Q values and the results of Mann-Whitney tests (\*\*\*\* p<0.0001) are also shown.

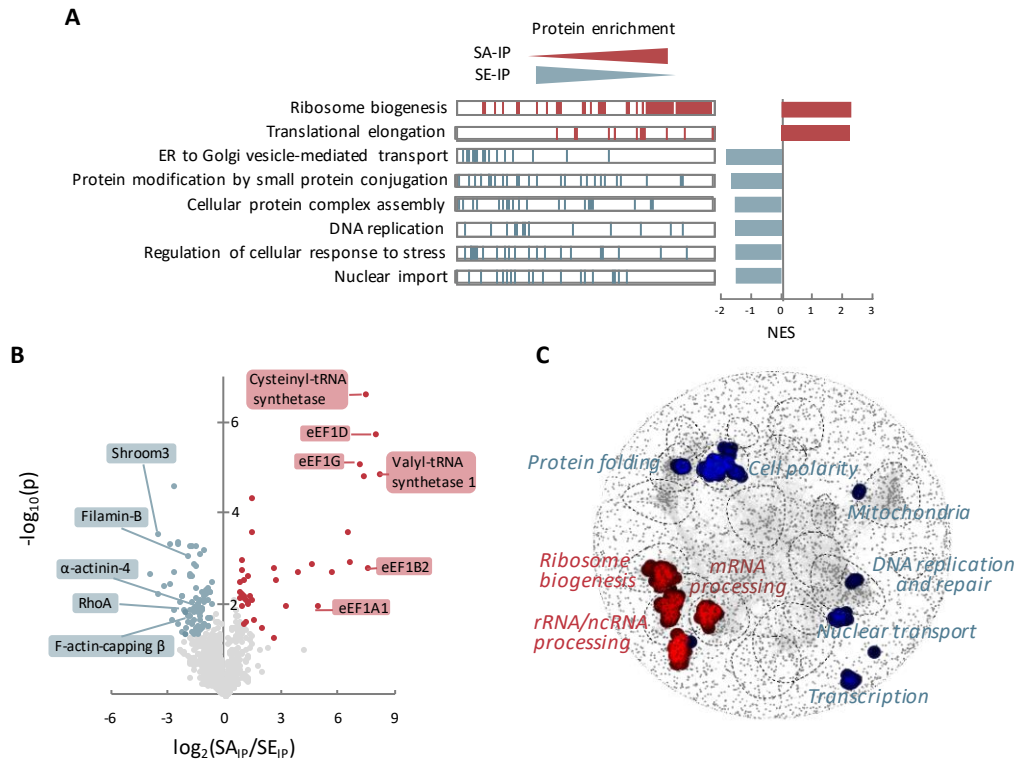

**Figure 2. Interactomic analysis of eEF1A2 phosphomutants dissects translational and non-canonical functions**

(A) Triplicate immunoprecipitates from HEK293T cells expressing FLAG-tagged SA and SE eEF1A2 proteins were analyzed by LC-MS/MS. The results of a gene set enrichment analysis of FLAG immunoprecipitates (SA-IP and SE-IP) are shown as barcode plots for the most significant GO terms (left). A bar chart with the corresponding normalized enrichment scores (NES) is also shown. See Figure 2—figure supplement 1 and Appendix 1—table 1 for details.

(B) Volcano plot showing the relative enrichment of identified interactors in immunoprecipitates of FLAG-tagged SA and SE eEF1A2 proteins. See Appendix 1—table 1 for details.

(C) Distribution of eEF1A2 SA (red) and SE (blue) interactor orthologues in the yeast global genetic interaction network. Categories enriched with the corresponding orthologues are indicated.



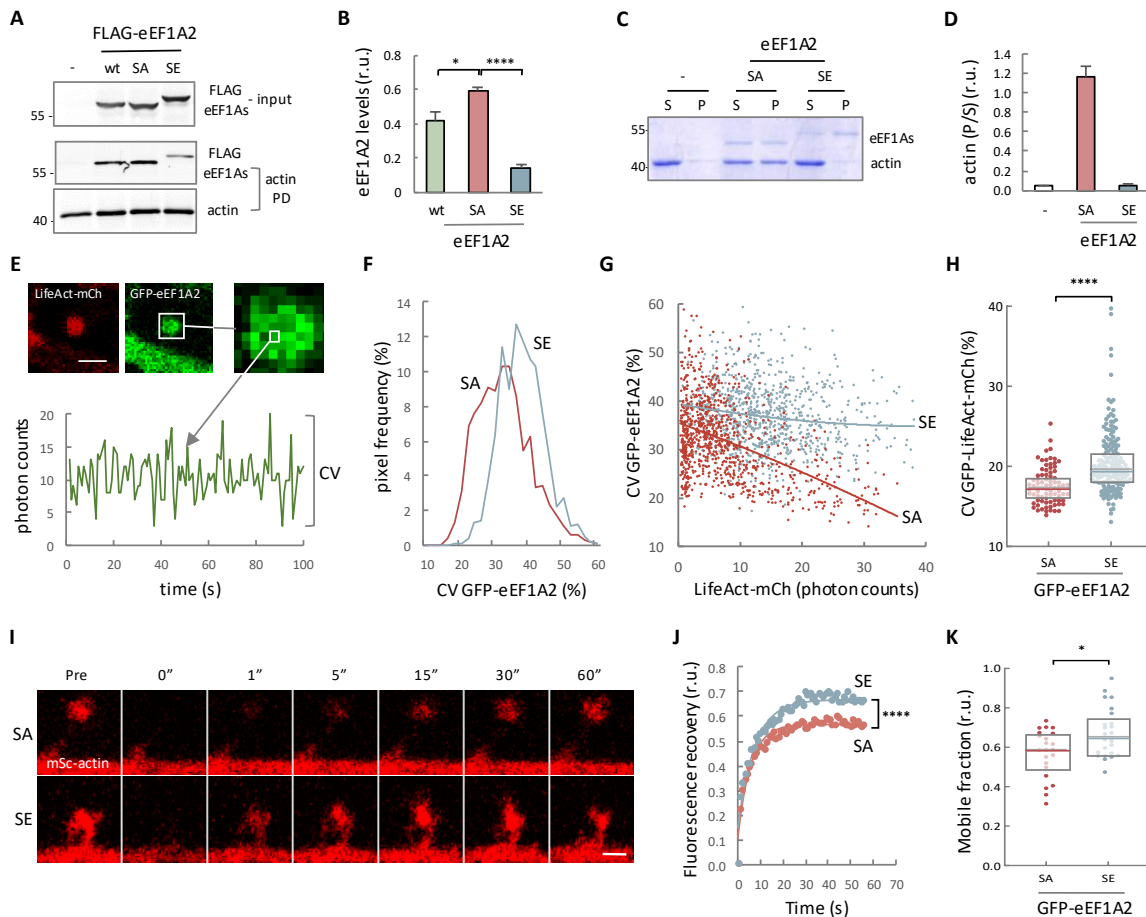

**Figure 3. Phosphomimetic residues in eEF1A2 hinder its association with F-actin and increase actin dynamics**

(A) Constructs expressing FLAG-tagged eEF1As were transiently transfected into HEK293T cells and, after 24 h, cells lysates were subject to biotin-actin binding assays. Lysate (input) and actin pull-down (PD) samples were analyzed by immunoblotting to detect actin or FLAG-tagged proteins. Empty vector was used as control (-).

(B) Quantification of eEF1A isoform ratios from immunoblot analysis as in panel A. Protein levels were normalized relative to input levels. Data are represented as mean  $\pm$  SEM (n=3), and the results of t tests (\*  $p < 0.05$ , \*\*\*\*  $p < 0.0001$ ) are also shown.

(C) Actin bundling assay with His-eEF1A2 fusion proteins. Supernatant (S) and pellet (P) fractions were subjected to SDS-PAGE and stained with Coomassie brilliant blue.

(D) Quantification of F-actin levels in pellet and supernatant fractions from actin bundling assays as in panel C. P/S ratios for eEF1A2 mutants (SA and SE) and control (-) are plotted as mean  $\pm$  SEM (n=3) values.

(E) Hippocampal neurons were transfected with plasmids expressing GFP-eEF1A2 and LifeAct-mCh as F-actin reporter, and dendritic spines were analyzed by time-lapse photon-counting microscopy. A representative temporal profile obtained from GFP-eEF1A2 in a single spine pixel is shown at the bottom. Bar, 1  $\mu$ m.

(F) Distributions of the coefficient of variation of fluorescence fluctuations from SA or SE GFP-eEF1A2 proteins as in panel E. The number of observations (pixels/spines) analyzed is as follows: SA, n=1084/12; SE, n=921/16.

(G) Coefficient of variation of fluorescence fluctuations from GFP-fusions of SA (red) or SE (blue) eEF1A2 proteins as a function of LifeAct-mCh levels as in panel E. Corresponding linear regression lines are also shown.

(H) Coefficient of variation of LifeAct-mCh fluorescence fluctuations in spine pixels above a threshold from hippocampal neurons cotransfected with GFP-fusions of SA (red) or SE (blue) eEF1A2 proteins as in panel E. Median  $\pm$  Q values are also plotted.

(I) Hippocampal neurons were transfected with plasmids expressing mSc-actin and SA or SE GFP-eEF1A2 proteins, and actin mobility in dendritic spines was analyzed by FRAP. Bar, 1  $\mu$ m.

(J) FRAP profiles from dendritic spines as in panel I. Mean values (n>25) and fitted lines are plotted. The result of a paired t-test is also indicated (\*\*\*\*  $p < 0.0001$ ).

(K) Mobile fraction of mSc-actin in single dendritic spines as in panel I. Median  $\pm$  Q values are also plotted. The result of a Mann-Whitney test (\*  $p < 0.05$ ) is also shown.

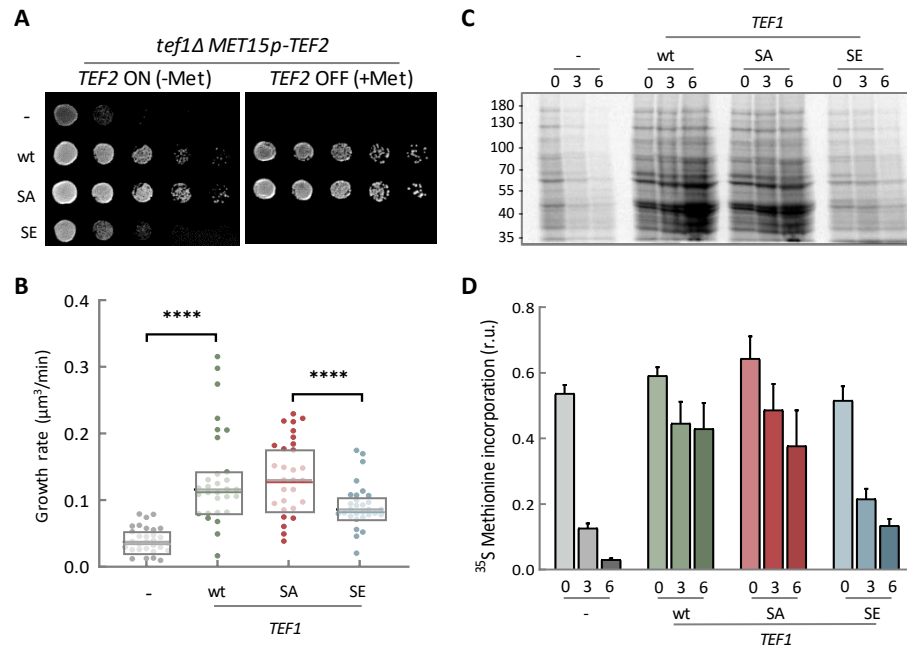

**Figure 4. The phosphomimetic eEF1A mutant cannot sustain protein synthesis in yeast cells**

(A) Growth of yeast cells expressing wt, SA and SE *TEF1* proteins. Cells with a *tef1* deletion and *TEF2* expression under the control of *MET15p* as a methionine-regulatable promoter were transformed with centromeric vectors expressing wt, SA or SE versions of *TEF1* under endogenous expression sequences, and plated in the absence (*TEF2* ON) or presence (*TEF2* OFF) of methionine to test complementation by *TEF1* proteins *in trans*.

(B) Growth rate in G1 phase of cells as in panel A under *TEF2* repression conditions. Single-cell volume growth rates (n=30) and the corresponding median  $\pm$  Q values are plotted. The results of Mann-Whitney tests are also shown (\*\*\*\* p<0.0001).

(C) Pulse-labeling analysis of protein synthesis in cells expressing wt, SA or SE *TEF1* proteins as in panel A. Cells were labeled for 5 min with  $^{35}\text{S}$ -methionine at 0, 3 and 6 h after *TEF2* repression, and lysates from equivalent culture volumes were analyzed by SDS-PAGE and autoradiography. Samples from control cells with empty vector (-) are also shown.

(D) Quantification of protein synthesis rates analyzed as in panel C. Data are represented as mean  $\pm$  SEM (n=3).

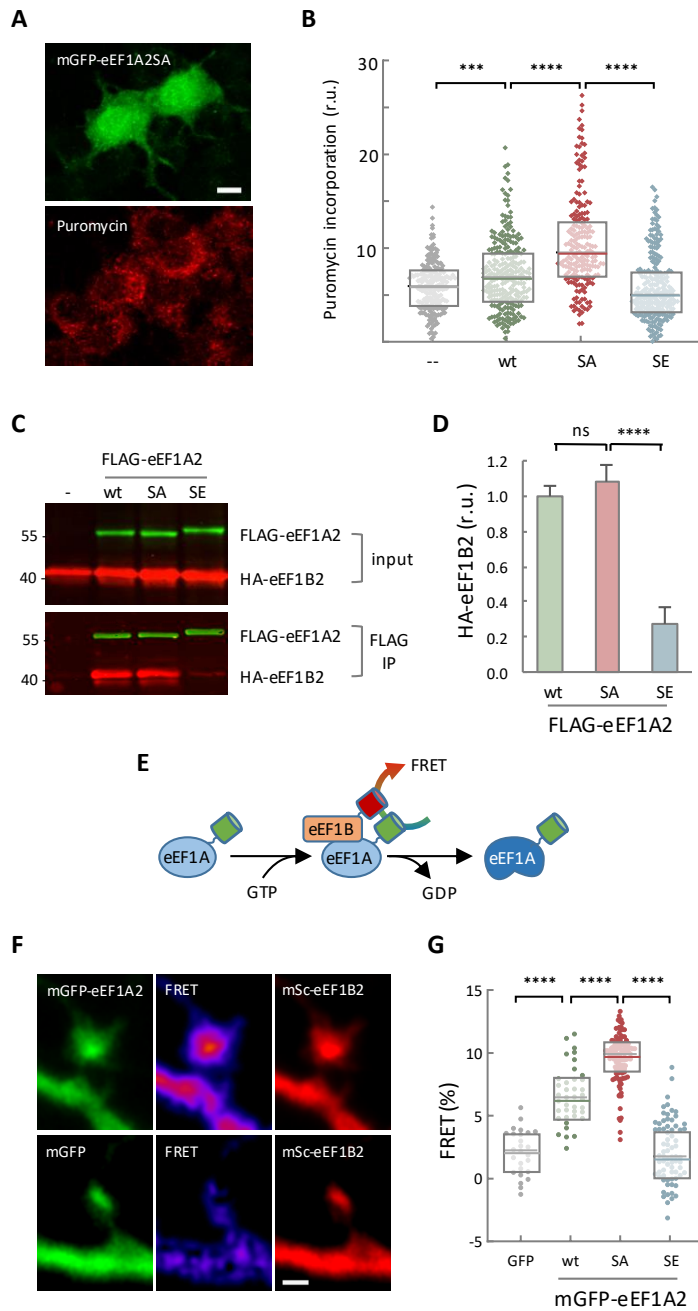

**Figure 5. eEF1A2 stimulates translation and interacts with its GEF in dendritic spines in a phosphosite-dependent manner**

(A) Neuro-2a cells stably expressing an shRNA against the endogenous eEF1A2 mRNA were cotransfected with plasmids expressing GFP and wt, SA or SE eEF1A2 proteins, and protein synthesis was assessed by puromycin incorporation and immunoblotting. Bar, 10  $\mu$ m.

(B) Quantification of puromycin incorporation in single Neuro-2a cells as in panel A. Median  $\pm$  Q values (n>200) are also plotted and the results of Mann-Whitney tests (\*\*\*) p<0.001; \*\*\*\* p<0.0001) are indicated.

(C) Interactions between eEF1A2 and eEF1B2. HEK293T cells were cotransfected with plasmids expressing HA-eEF1B2 and FLAG-tagged wt, SA or SE eEF1A2 proteins. Immunoprecipitation was performed with  $\alpha$ FLAG beads, and HA-eEF1B2 and FLAG-tagged eEF1A2 protein levels in lysates (input) and immunoprecipitation (IP) samples were simultaneously analyzed by immunoblotting.

(D) Quantification of eEF1B2 levels in IP samples from immunoblot analysis as in panel C. eEF1B2 protein levels were normalized relative to FLAG-tagged proteins in IP samples. Mean  $\pm$  SEM (n=4), and the results of t tests (\*\*\*\* p<0.0001) are shown.

(E) Schematic of the FRET strategy for quantifying the eEF1A2/ eEF1B2 interaction in dendritic spines.

(F) Fluorescence and FRET images of representative spines from hippocampal neurons expressing mScarlet-eEF1B2 and mGFP-eEF1A2 or mGFP as control. Bar, 1  $\mu$ m.

(G) FRET levels in spines from hippocampal neurons as in panel F expressing mScarlet-eEF1B2 and mGFP or mGFP-tagged wt, SA or SE eEF1A2 proteins. The total number of observations (spines/neurons) analyzed is as follows: GFP, n=30/5; wt, n=40/6; SA, n=118/8; SE, n=75/7. Median  $\pm$  Q values are plotted and the results of Mann-Whitney tests (\* p<0.05; \*\* p<0.01; \*\*\* p<0.001) are also shown.

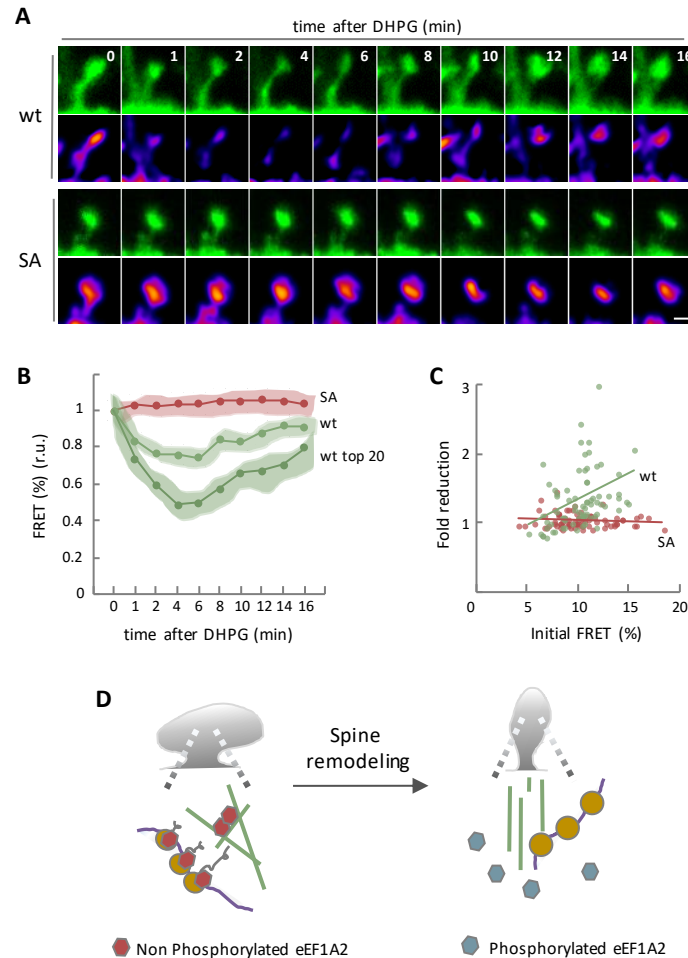

**Figure 6. DHPG induces transient phosphosite-mediated dissociation of eEF1A2 from its GEF factor in dendritic spines**

(A) Fluorescence and FRET images of representative spines from hippocampal neurons expressing mScarlet-eEF1B2 and mGFP-tagged wt or SA eEF1A2 proteins at the indicated times after DHPG addition. Bar, 1  $\mu$ m.

(B) FRET levels in spines from hippocampal neurons as in panel A expressing mScarlet-eEF1B2 and mGFP-tagged wt or SA eEF1A2 proteins as a function of time after DHPG addition. The total number of observations (spines/neurons) analyzed is as follows: wt, n=76/10; SA, n=131/12. FRET levels were made relative to time 0 and mean  $\pm$  CL ( $\alpha=0.05$ ) values are plotted. Data from 20 spines with highest initial FRET values produced by wt eEF1A2 are also shown.

(C) Transient fold-reduction in FRET as a function of initial FRET levels for mGFP-tagged wt (green) and SA (red) eEF1A2 proteins analyzed as in panel B.

(D) Proposed role of eEF1A2 in dendritic spine remodeling. Two subpopulations of non-phosphorylated eEF1A2 would exist in stable spines, one involved in translation, likely in a monomeric conformation, and the other participating as dimers in F-actin bundles. As a result of synaptic stimulation, phosphorylation would dissociate eEF1A2 from F-actin and facilitate remodeling of the spine cytoskeleton. At the same time, eEF1A2 phosphorylation would cause its inactivation as a translation elongation factor, thus transiently preventing undesired protein accumulation before superimposed signals establish longer-term decisions as varied as LTP or LTD.

**A**

|                |                                                                                                                                          |                                                        |             |
|----------------|------------------------------------------------------------------------------------------------------------------------------------------|--------------------------------------------------------|-------------|
|                | <b>S342</b>                                                                                                                              | <b>S358</b>                                            | <b>S393</b> |
| Mouse eEF1A2   | AQFT <b>S</b> QV I I L N H P G Q I S A G Y <b>S</b> P V I D C H T A H I A C K F A E L K E K I D R R S G K K L E D N P K <b>S</b> L K S G |                                                        |             |
| Mouse eEF1A1   | AGFTAQV I I L N H P G Q I S A G Y A P V L D C H T A H I A C K F A E L K E K I D R R S G K K L E D G P K F L K S G                        |                                                        |             |
| Chicken eEF1A2 | AQFT <b>S</b> QV I I L N H P G Q I S A G Y <b>S</b> P V I D C H T A H I A C K F A E L K E K I D R R S G K K L E D N P K <b>S</b> L K S G |                                                        |             |
| Chicken eEF1A1 | AGFTAQV I I L N H P G Q I S A G Y A P V L D C H T A H I A C K F A E L K E K I D R R S G K K L E D G P K F L K S G                        |                                                        |             |
| Xenopus EF1A2  | AGFT <b>S</b> QV I I L N H P G Q I S A G Y <b>S</b> P V I D C H T A H I A C K F A E L K E K I D R R S G K K L E D N P K <b>S</b> L K S G |                                                        |             |
| Xenopus EF1A1  | GTFTAQV I I L N H P G Q I G A G Y A P V L D C H T A H I A C K F A E L K E K I D R R S G K K L E D N P K F L K S G                        |                                                        |             |
| Fly eEF1A2     | ADFTAQV I V L N H P G Q I A N G Y <b>T</b> P V L D C H T A H I A C K F S E I K E K C D R R T G K T T E T E P K A I K S G                 |                                                        |             |
| Fly eEF1A1     | ADFTAQV I V L N H P G Q I A N G Y <b>T</b> P V L D C H T A H I A C K F A E I K E K V D R R S G K T T E E N P K F I K S G                 |                                                        |             |
| Yeast TEF2     | ASFNATV I V L N H P G Q I S A G Y <b>S</b> P V L D C H T A H I A C R F D E L L E K N D R R S G K K L E D H P K F L K S G                 |                                                        |             |
| Yeast TEF1     | ASFNATV I V L N H P G Q I S A G Y <b>S</b> P V L D C H T A H I A C R F D E L L E K N D R R S G K K L E D H P K F L K S G                 |                                                        |             |
|                | : * : ** : *****                                                                                                                         | ** : ** : ***** : * * : : * ** : ** . * . ** : : * . * |             |
|                |                                                                                                                                          |                                                        | <b>S445</b> |
| Mouse eEF1A2   | DAAIVEMVPGKPMCVEFSFSQYPPLGRFAVRDMRQTVAVGV I K N V E K K <b>S</b> G G A G K V T K S A Q K                                                 |                                                        |             |
| Mouse eEF1A1   | DAAIVDMVPGKPMCVEFSFSQYPPLGRFAVRDMRQTVAVGV I K A V D K K A A G A G K V T K S A Q K                                                        |                                                        |             |
| Chicken eEF1A2 | DAAIVDMI PGKPMCVEFSFSQYPPLGRFAVRDMRQTVAVGV I K N V E K K <b>S</b> G G A G K V T K S A Q K                                                |                                                        |             |
| Chicken eEF1A1 | DAAIVEM I P G K P M C V E S F S D Y P P L G R F A V R D M R Q T V A V G V I K A V D K K A G A G K V T K S A Q K                          |                                                        |             |
| Xenopus EF1A2  | DAAIVDMI PGKPMCVEFSFSQYPPLGRFAVRDMRQTVAVGV I K N V E K K <b>S</b> G G A G K V T K S A Q K                                                |                                                        |             |
| Xenopus EF1A1  | DAAIVDMI PGKPMCVEFSFSQYPPLGRFAVRDMRQTVAVGV I K A V D K K A A G A G K V T K S A Q K                                                       |                                                        |             |
| Fly eEF1A2     | DAAI I V L V P S K P L C V E S F Q E F P P L G R F A V R D M R Q T V A V G V I K S V N F K E T T S G K V T K A A E K                     |                                                        |             |
| Fly eEF1A1     | DAAI V N L V P S K P L C V E A F Q E F P P L G R F A V R D M R Q T V A V G V I K A V N F K D A S G G K V T K A A E K                     |                                                        |             |
| Yeast TEF2     | DAALVKFVPSKPMCVEAFSEY P P L G R F A V R D M R Q T V A V G V I K S V D K T E K - A A K V T K A A Q K                                      |                                                        |             |
| Yeast TEF1     | DAALVKFVPSKPMCVEAFSEY P P L G R F A V R D M R Q T V A V G V I K S V D K T E K - A A K V T K A A Q K                                      |                                                        |             |
|                | *** : : * . : * : ** : * : : ***** : : : : : . . . . . * . *                                                                             |                                                        |             |

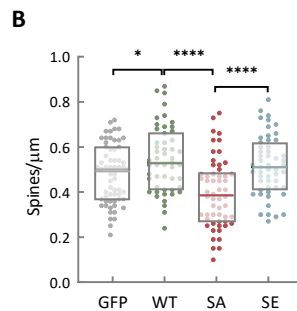

**Figure 1–figure supplement 1. eEF1A2 phosphosite configuration modulates spine growth**

(A) Sequence alignment of the eEF1A2 C-terminal domain from different species. Conserved serine residues mutated in this study are highlighted in red.

(B) Quantification of spines per  $\mu\text{m}$  in hippocampal neurons transfected with plasmids expressing GFP or GFP-tagged wt, SA or SE eEF1A2 proteins. The total number of observations (spines/neurons) plotted is as follows: GFP,  $n=1990/61$ ; wt,  $n=2040/51$ ; SA,  $n=1434/56$ ; SE,  $n=1952/53$ . Single-neuron data (dots) from three independent experiments and median  $\pm$  Q values are plotted. The results of Mann-Whitney tests (\*  $p < 0.02$ ; \*\*\*\*  $p < 0.0001$ ) are also indicated.

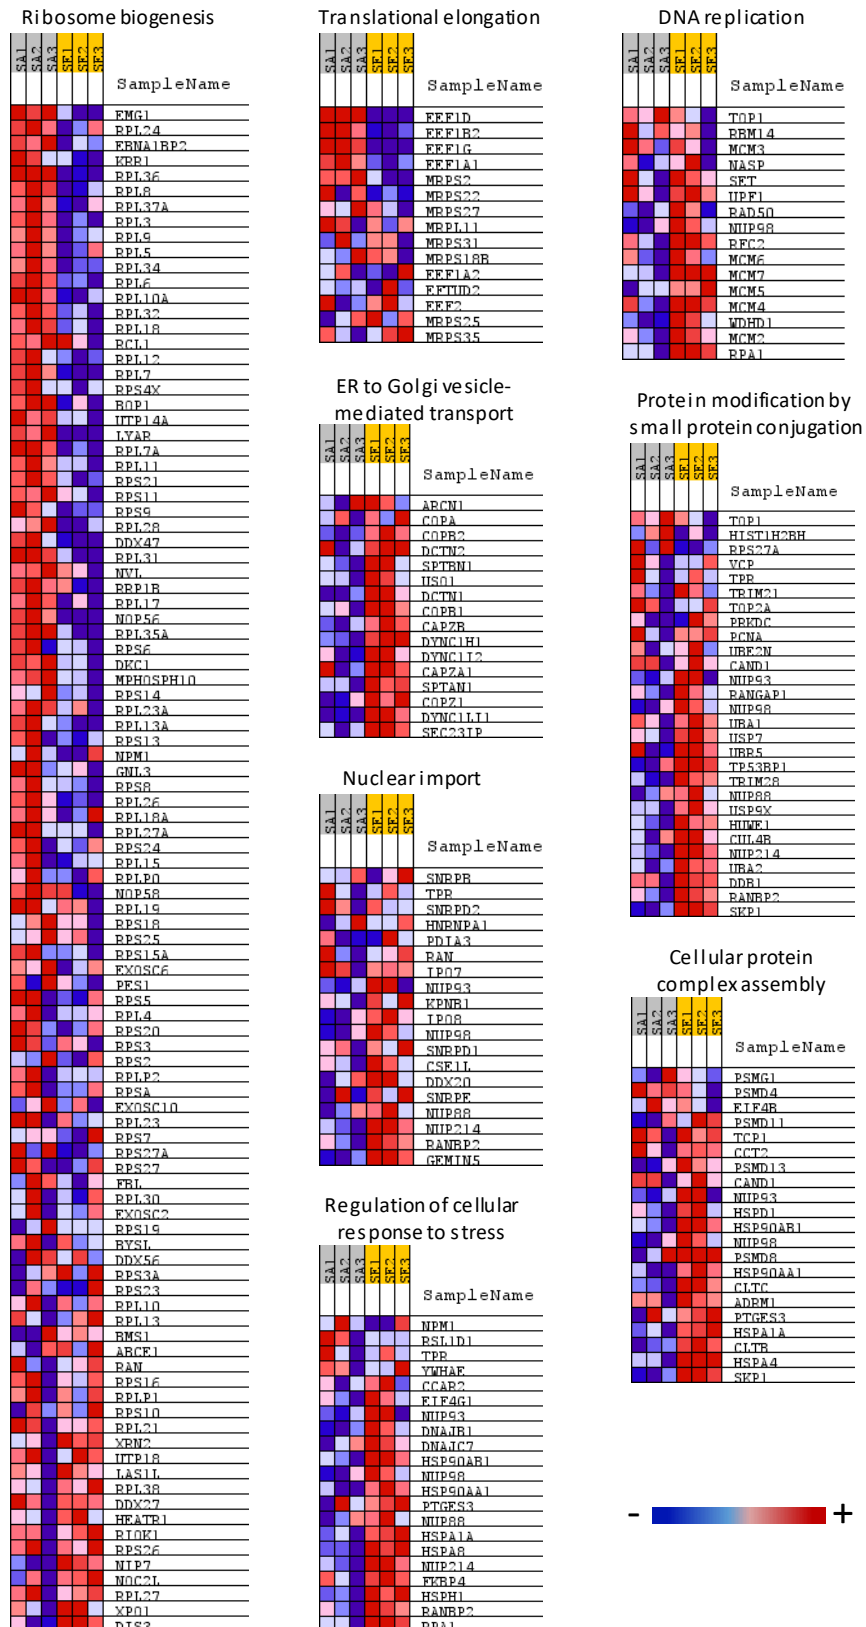

**Figure 2–figure supplement 1. Interatomic analysis of eEF1A2 phosphomutants dissects translational and non-canonical functions**

Triplicate immunoprecipitates from HEK293T cells expressing FLAG-tagged SA and SE eEF1A2 proteins were analyzed by LC-MS/MS. Colors in the heatmap denote high (red) to low (blue) normalized enrichment scores of individual proteins in the corresponding GO terms.

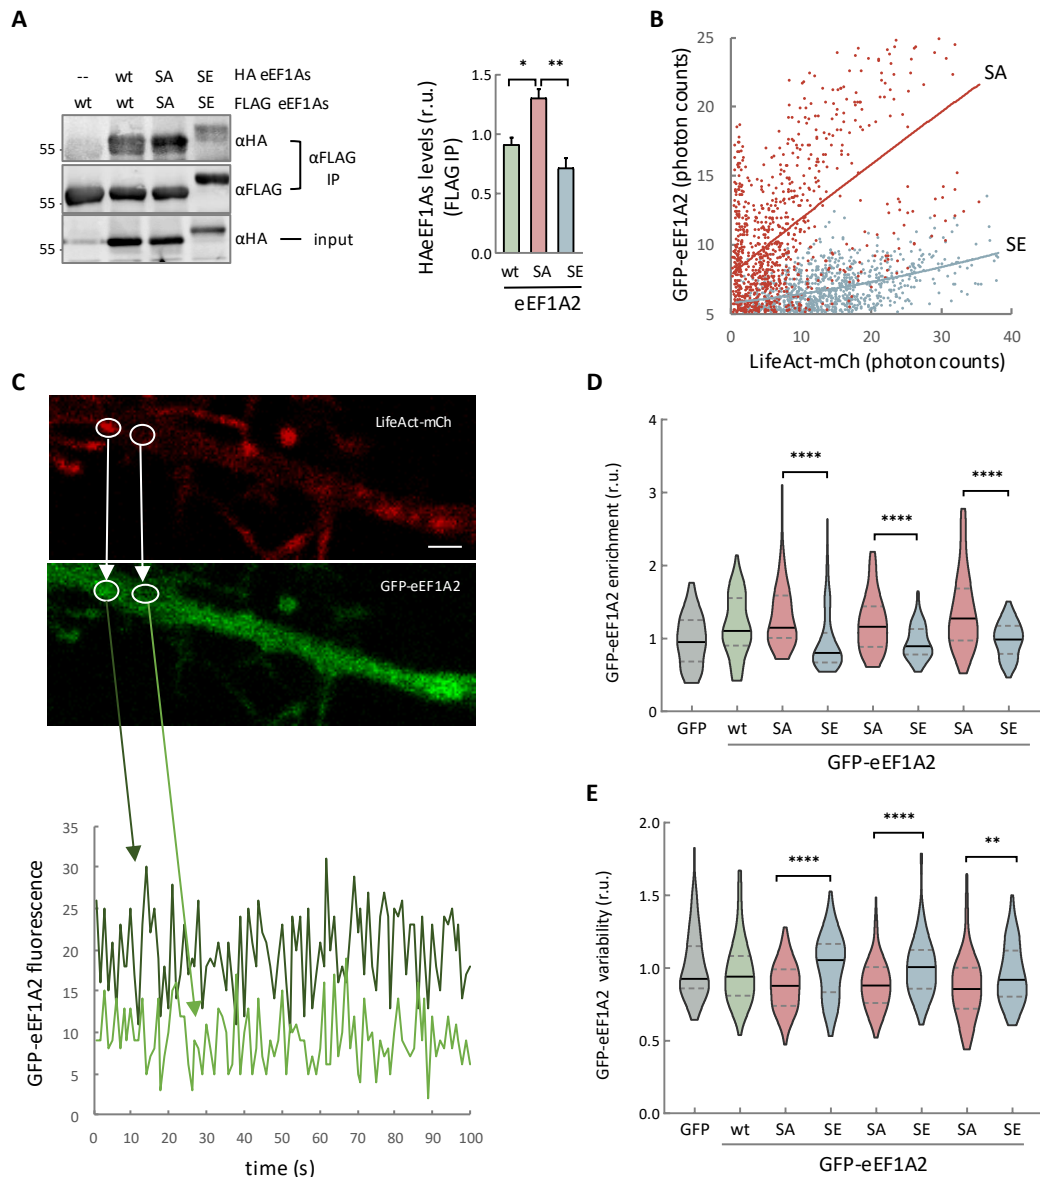

### Figure 3—figure supplement 1. Phosphomimetic residues in eEF1A2 hinder its association with F-actin

(A) Immunoprecipitates (FLAG-IP) and lysates (input) from HEK293T cells expressing wt, SA and SE eEF1A2 proteins tagged with HA or FLAG as indicated were analyzed by immunoblotting. HA-tagged protein levels were normalized relative to FLAG-tagged protein levels in IP samples. Data are represented as mean  $\pm$  SEM (n=4), and the results of t tests (\*  $p < 0.02$ , \*\*  $p < 0.01$ ) are also shown.

(B) Hippocampal neurons were transfected as in Figure 3E and levels of GFP-fusions of SA (red) or SE (blue) eEF1A2 proteins as a function of LifeAct-mCh levels and linear regression lines are plotted.

(C) Dendritic regions from hippocampal neurons as in Figure 3E were analyzed by time-lapse photon-counting microscopy. Representative temporal profiles obtained from GFP-tagged SA eEF1A2 in single dendritic pixels with high (dark green) or low (light green) LifeAct-mCh levels are shown at the bottom. Bar, 2  $\mu$ m.

(D) Levels of GFP-tagged wt (green), SA (red) or SE (blue) eEF1A2 proteins in dendritic pixels with high levels of LifeAct-mCh as in panel C. Cells expressing GFP (gray) are shown as control. Relative fluorescence levels in 200 pixels from 3 independent dendrites are plotted with median  $\pm$  Q values for each condition. The results of Mann-Whitney tests (\*\*  $p < 0.01$ ; \*\*\*\*  $p < 0.0001$ ) from triplicate samples are also indicated.

(E) Coefficient of variation of fluorescence fluctuations from GFP-tagged wt (green), SA (red) or SE (blue) eEF1A2 proteins in dendritic pixels with high levels of LifeAct-mCh as in panel C. Cells expressing GFP (gray) are shown as control. Coefficients of variation in 200 pixels from 3 independent dendrites are plotted with median  $\pm$  Q values for each condition. Results from triplicate experiments are shown for SA and SE mutant proteins. The results of Mann-Whitney tests (\*\*  $p < 0.01$ ; \*\*\*\*  $p < 0.0001$ ) are also indicated.

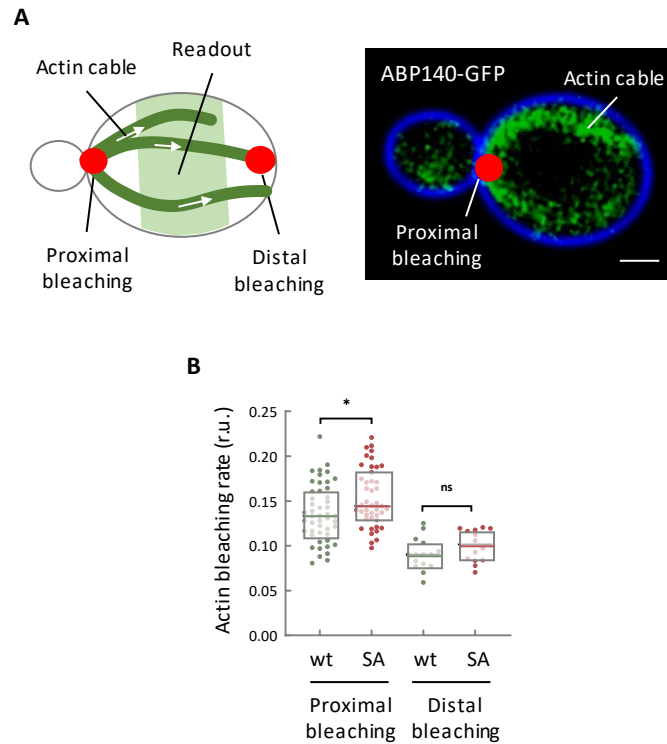

**Figure 4—figure supplement 1. The phosphoablated eEF1A2 mutant promotes actin cable stability in yeast cells**

(A) Schematic of a yeast cell showing the direction of actin cable growth from the bud towards the opposite pole of the mother cell (left panel). A representative image of actin cables as evidenced by Abp140p-GFP is also shown (right panel; bar, 1  $\mu$ m). Due to actin cable growth, proximal bleaching has a stronger effect on FLIP readout at the middle third of the cell compared to distal bleaching.

(B) FLIP efficiency of Abp140p-GFP at proximal and distal positions in yeast cells expressing wt or SA TEF1 proteins under *TEF2* repression conditions as in Figure 4A. The number of observations (cells) analyzed is as follows: proximal bleaching wt, n=48; SA, n=44; and distal bleaching wt, n=15; SA, n=14. The results of a Mann-Whitney tests (\*  $p < 0.02$ ; ns, non-significant) are also shown.



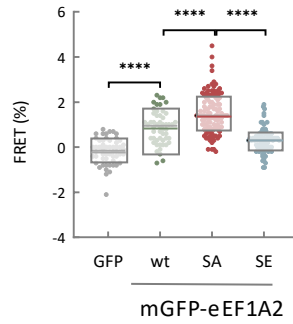

**Figure 5—figure supplement 1. eEF1A2 interacts with its GEF in Neuro-2a cells in a phosphosite-dependent manner**

FRET levels in Neuro-2a cells expressing mScarlet-eEF1B2 and mGFP or mGFP-tagged wt, SA or SE eEF1A2 proteins. The number of observations (cells) analyzed is as follows: GFP n=55; wt, n=53; SA, n=60; SE, n=48; all from three independent experiments. Median  $\pm$  Q values are plotted and the results of Mann-Whitney tests (\*\*\*\* p<0.0001) are also shown.

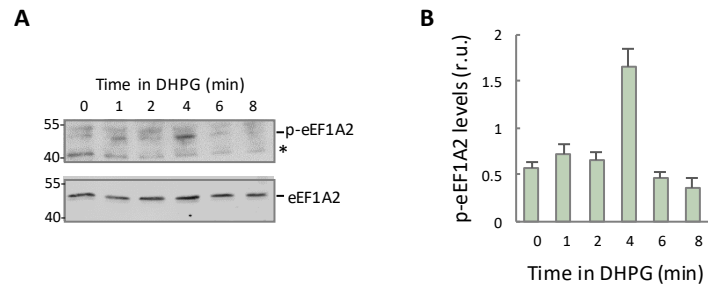

**Figure 6—figure supplement 1. DHPG transiently phosphorylates eEF1A2 at Ser358**

(A) Cortical cultured neurons were treated with DHPG and lysates were obtained at different time points for immunoblot analysis with p-eEF1A2 (upper panel) or total eEF1A2 (lower panel) antibodies. Asterisk indicates a nonspecific band.

(B) Quantification of phospho-eEF1A2 from immunoblot analysis as in panel A. Phospho-eEF1A2 levels were normalized relative to eEF1A2 protein levels. Data are represented as mean  $\pm$  SEM (n=4).
